# Supplementary material for: Unusual Bicyclo[3.2.1]Octanoid Neolignans from Leaves of Piper crocatum and Their Effect on Pyruvate Dehydrogenase Activity
Source: MDPI journal article supplement (doi:10.3390/plants10091855), 2021-09-07
Supplement: s1 [file s1]

**Unusual bicyclo [3.2.1] octanoid neolignans from leaves of *Piper crocatum* and their effect on pyruvate dehydrogenase activity.**

**Yu Juan Chai <sup>1,†</sup>, Younghoon Go <sup>2,†</sup>, Hai Qi Zhou <sup>3</sup>, HongXu Li <sup>3</sup>, Sun Joo Lee <sup>4</sup>, Yeo Jin Park <sup>2,5</sup>, Wahyu Widowatib <sup>6</sup>, Rizal Rizal <sup>7</sup>, Young Ho Kim <sup>8</sup>, Seo Young Yang <sup>9,\*</sup>, and Wei Li <sup>2,\*</sup>**

1 School of Biomedical Engineering, Health Science Center, Shenzhen University, Shenzhen 518060, China; [chaiyj@szu.edu.cn](mailto:chaiyj@szu.edu.cn)

2 Korean Medicine (KM) Application Center, Korea Institute of Oriental Medicine, Daegu 41062, Korea; [gotra827@kiom.re.kr](mailto:gotra827@kiom.re.kr)

3 Shenzhen Key Laboratory of Marine Bioresource and Eco-environmental Science, College of Life Sciences and Oceanography, Shenzhen University, Shenzhen, 518060, China; [2170257307@email.szu.edu.cn](mailto:2170257307@email.szu.edu.cn)

4 New Drug Development Center, Daegu-Gyeongbuk Medical Innovation Foundation, 80 Cheombok-ro, Dong-gu, Daegu 41061, Korea; [disjrk@dgmif.re.kr](mailto:disjrk@dgmif.re.kr)

5 Korean Convergence Medicine, University of Science and Technology, Daejeon 34054, Republic of Korea;

6 Medical Research Centre, Faculty of Medicine, Maranatha Christian University, Bandung, 40164, Indonesia; [wahyu\\_w60@yahoo.com](mailto:wahyu_w60@yahoo.com)

7 Biomolecular Biomedical Research Center for Biology, Indoensian Institute of Sciences, Bandung, 40163, Indonesia; [rizal\\_biotek@yahoo.com](mailto:rizal_biotek@yahoo.com)

8 College of Pharmacy, Chungnam National University, Daejeon 34134, Korea; [yhk@cnu.ac.kr](mailto:yhk@cnu.ac.kr)

9 Department of Pharmaceutical Engineering, Sangji University, 83 Sangjidae-gil, Wonju-si, Gangwon-do, 26339, Republic of Korea

\* Correspondence: [syyang@sangji.ac.kr](mailto:syyang@sangji.ac.kr) (S.Y.Y.); [liweil1986@kiom.re.kr](mailto:liweil1986@kiom.re.kr) (W.L.) Tel.: +82-42-821-5933 (S.Y.Y.); +82-53-940-3874 (W.L.)

† These authors contributed equally to this work.

|                                                                                                           |    |
|-----------------------------------------------------------------------------------------------------------|----|
| Figure S1. $^1\text{H}$ -NMR (600 MHz, dimethyl sulfoxide- $d_6$ ) spectrum of compound <b>1</b> .....    | 4  |
| Figure S2. $^{13}\text{C}$ -NMR (150 MHz, dimethyl sulfoxide- $d_6$ ) spectrum of compound <b>1</b> ..... | 5  |
| Figure S3. HSQC spectrum of compound <b>1</b> .....                                                       | 6  |
| Figure S4. HMBC spectrum of compound <b>1</b> .....                                                       | 7  |
| Figure S5. COSY spectrum of compound <b>1</b> .....                                                       | 8  |
| Figure S6. ROESY spectrum of compound <b>1</b> .....                                                      | 9  |
| Figure S7. Adjacent torsion angles of compound <b>1</b> .....                                             | 10 |
| Figure S7. HR-ESI-MS spectrum of compound <b>1</b> .....                                                  | 11 |
| Figure S8. $^1\text{H}$ -NMR (600 MHz, acetone- $d_6$ ) spectrum of compound <b>2</b> .....               | 12 |
| Figure S9. $^{13}\text{C}$ -NMR (150 MHz, acetone- $d_6$ ) spectrum of compound <b>2</b> .....            | 13 |
| Figure S10. HSQC spectrum of compound <b>2</b> .....                                                      | 14 |
| Figure S11. HMBC spectrum of compound <b>2</b> .....                                                      | 15 |
| Figure S12. COSY spectrum of compound <b>2</b> .....                                                      | 16 |
| Figure S13. ROESY spectrum of compound <b>2</b> .....                                                     | 17 |
| Figure S14. HR-ESI-MS spectrum of compound <b>2</b> .....                                                 | 18 |
| Figure S15. $^1\text{H}$ -NMR (600 MHz, methanol- $d_4$ ) spectrum of compound <b>3</b> .....             | 19 |
| Figure S16. $^{13}\text{C}$ -NMR (150 MHz, methanol- $d_4$ ) spectrum of compound <b>3</b> .....          | 20 |

|                                                                        |           |
|------------------------------------------------------------------------|-----------|
| Figure S17. HSQC spectrum of compound <b>3</b> .....                   | <b>21</b> |
| Figure S18. HMBC spectrum of compound <b>3</b> .....                   | <b>22</b> |
| Figure S19. COSY spectrum of compound <b>3</b> .....                   | <b>23</b> |
| Figure S20. ROESY spectrum of compound <b>3</b> .....                  | <b>24</b> |
| Figure S22. Adjacent torsion angles of compound <b>3</b> .....         | <b>25</b> |
| Figure S23. HR-ESI-MS spectrum of compound <b>3</b> .....              | <b>26</b> |
| Figure S24. Speculated biosynthetic pathway of compound <b>1</b> ..... | <b>27</b> |
| Figure S25. Speculated biosynthetic pathway of compound <b>3</b> ..... | <b>28</b> |

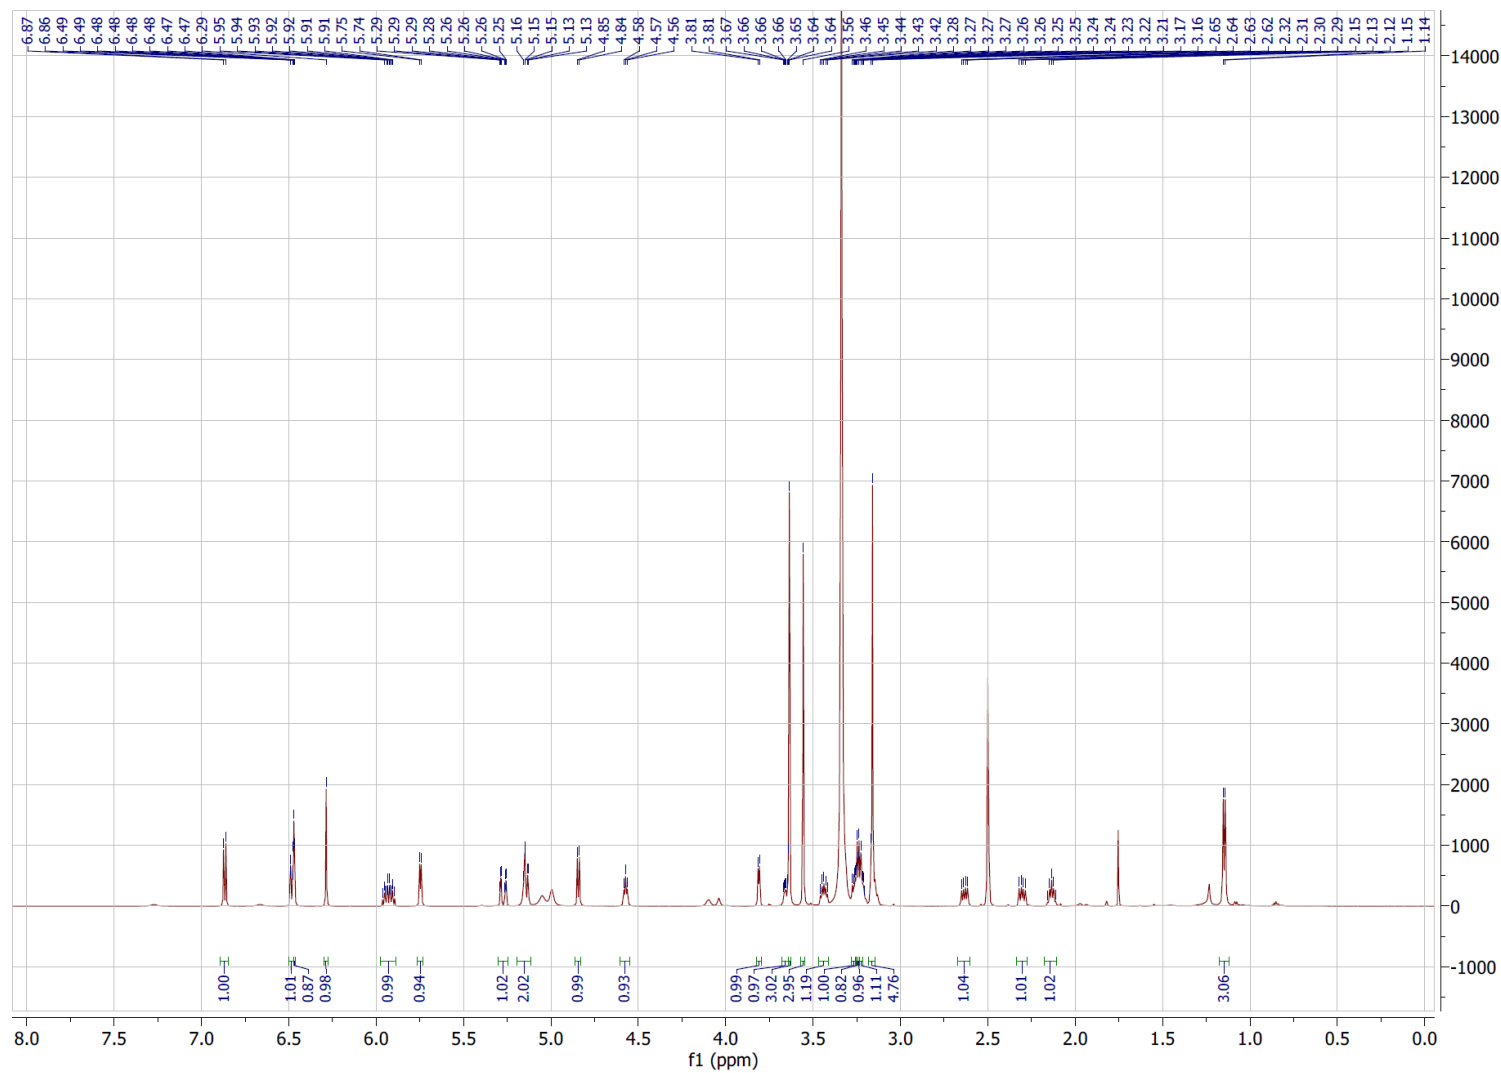

Figure S1.  $^1\text{H}$ -NMR (600 MHz,  $\text{dimethyl sulfoxide-}d_6$ ) spectrum of compound **1**

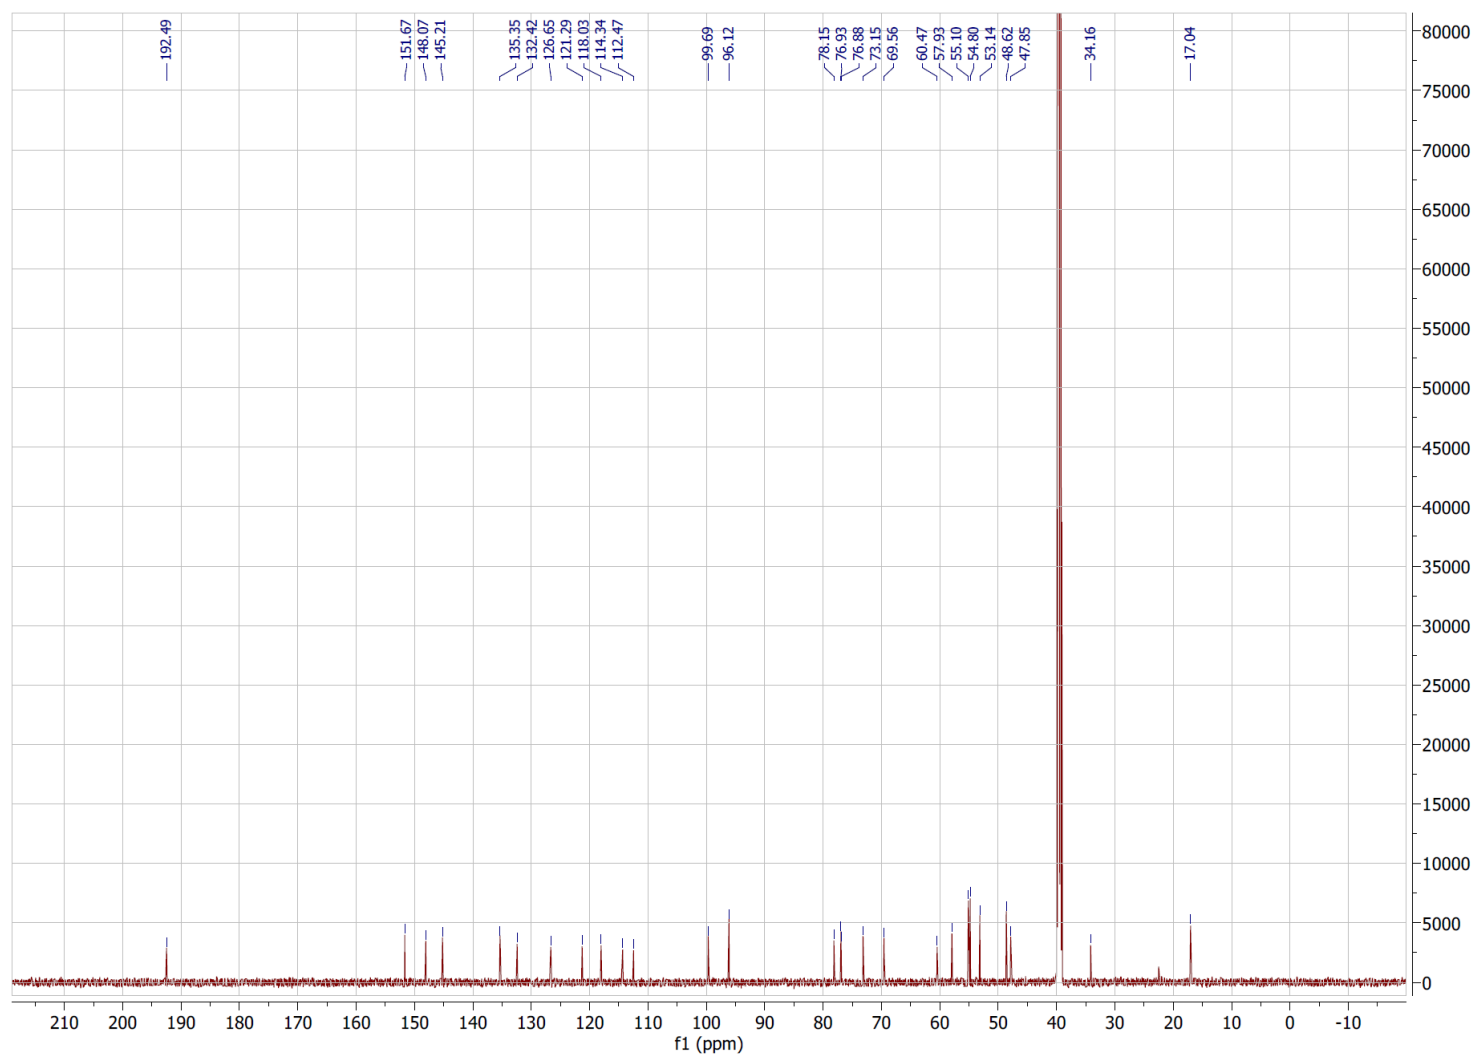

Figure S2. <sup>13</sup>C-NMR (150 MHz, dimethyl sulfoxide-*d*<sub>6</sub>) spectrum of compound **1**

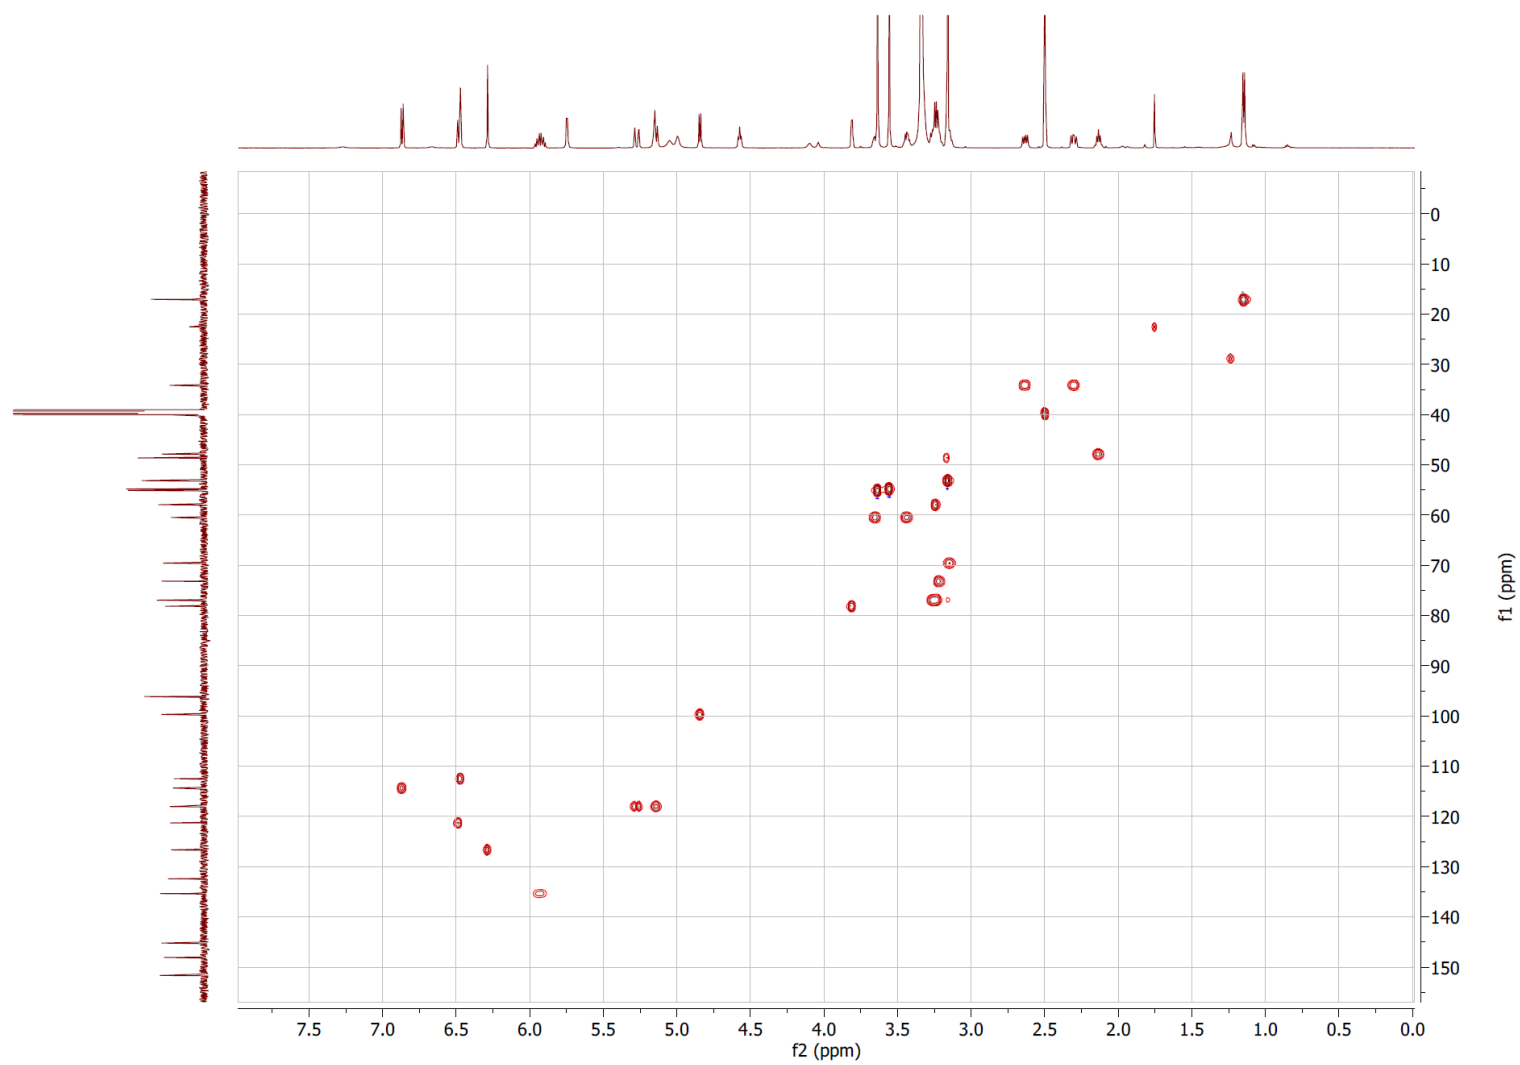

Figure S3. HSQC spectrum of compound **1**

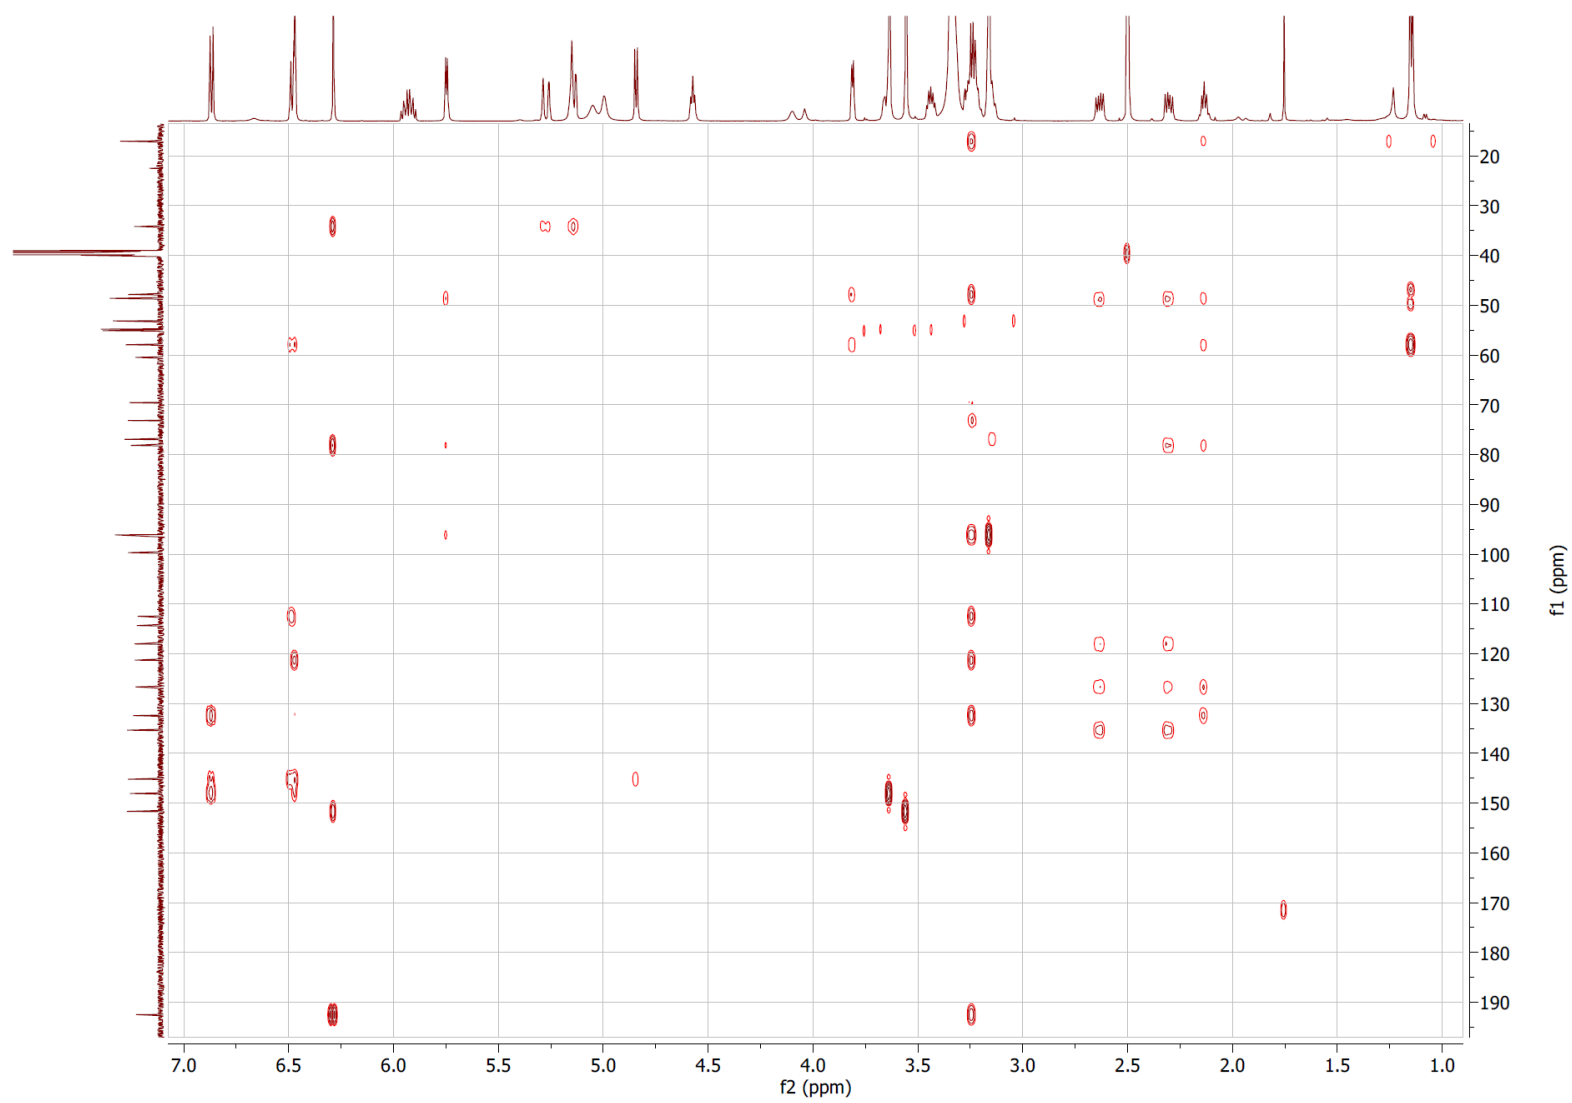

Figure S4. HMBC spectrum of compound

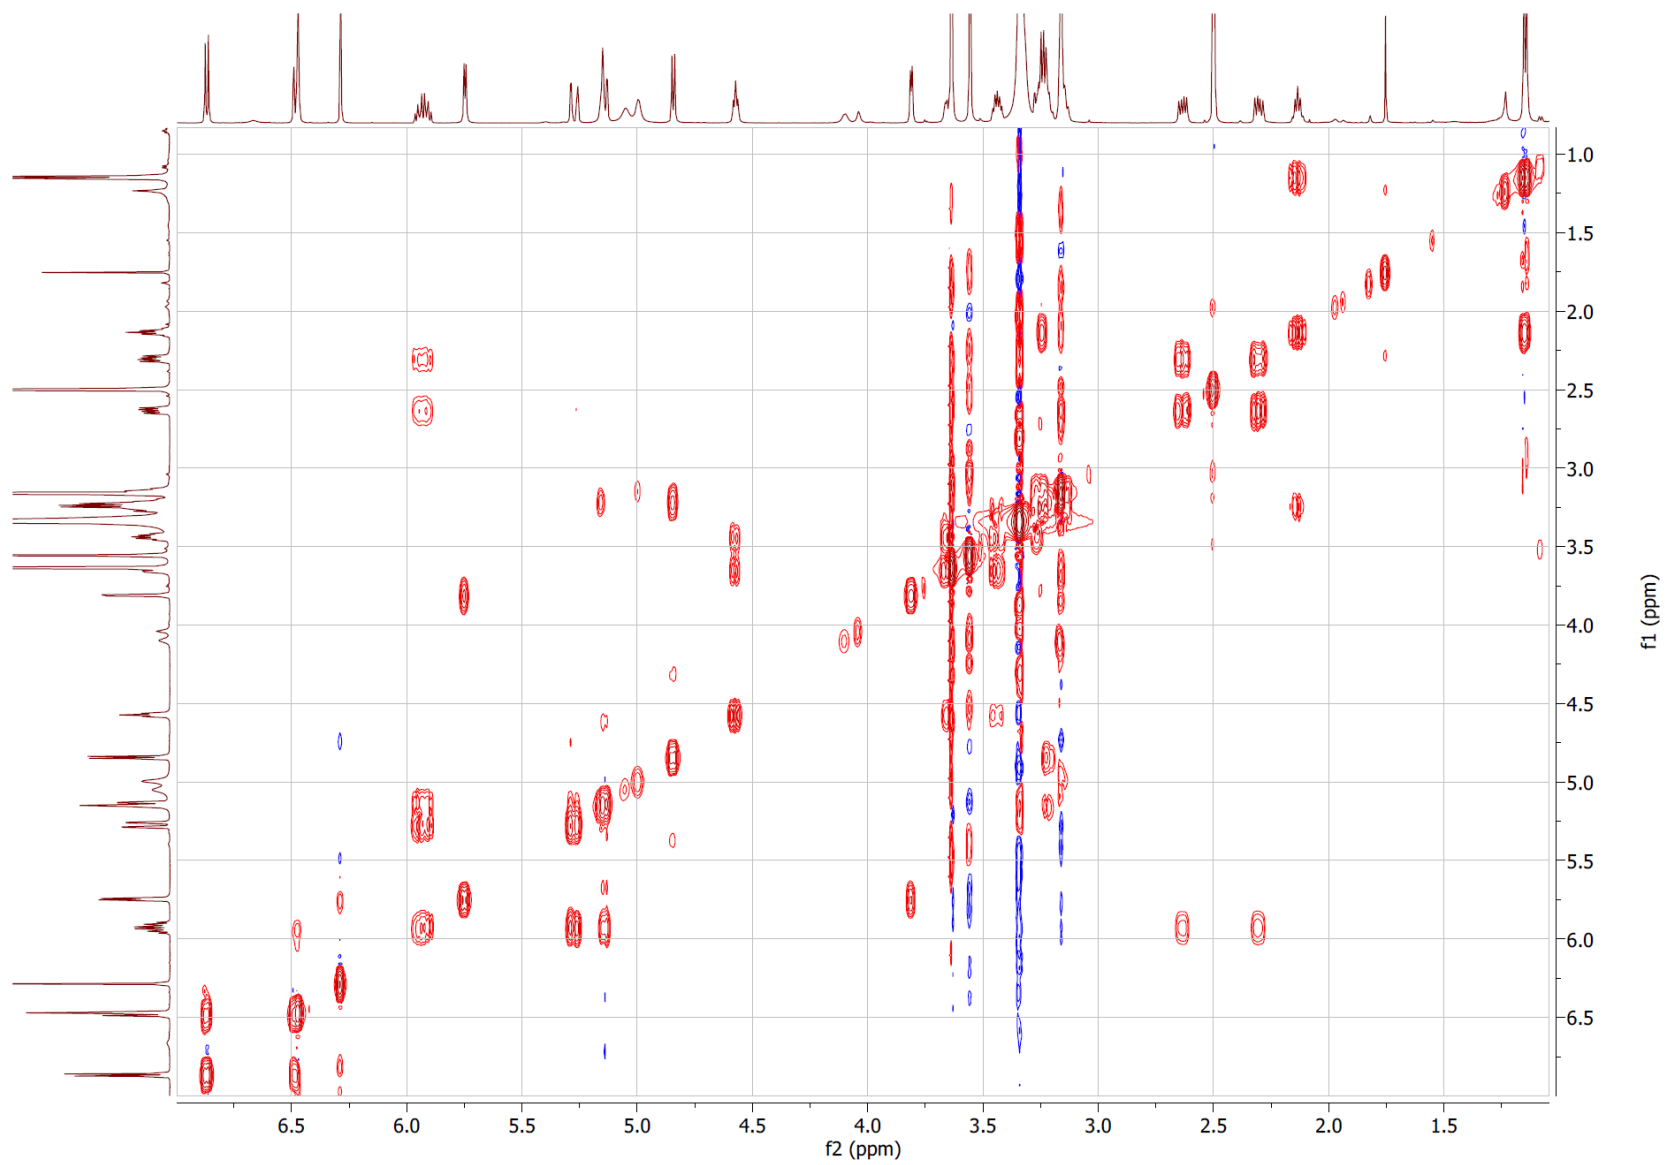

Figure S5. COSY spectrum of compound

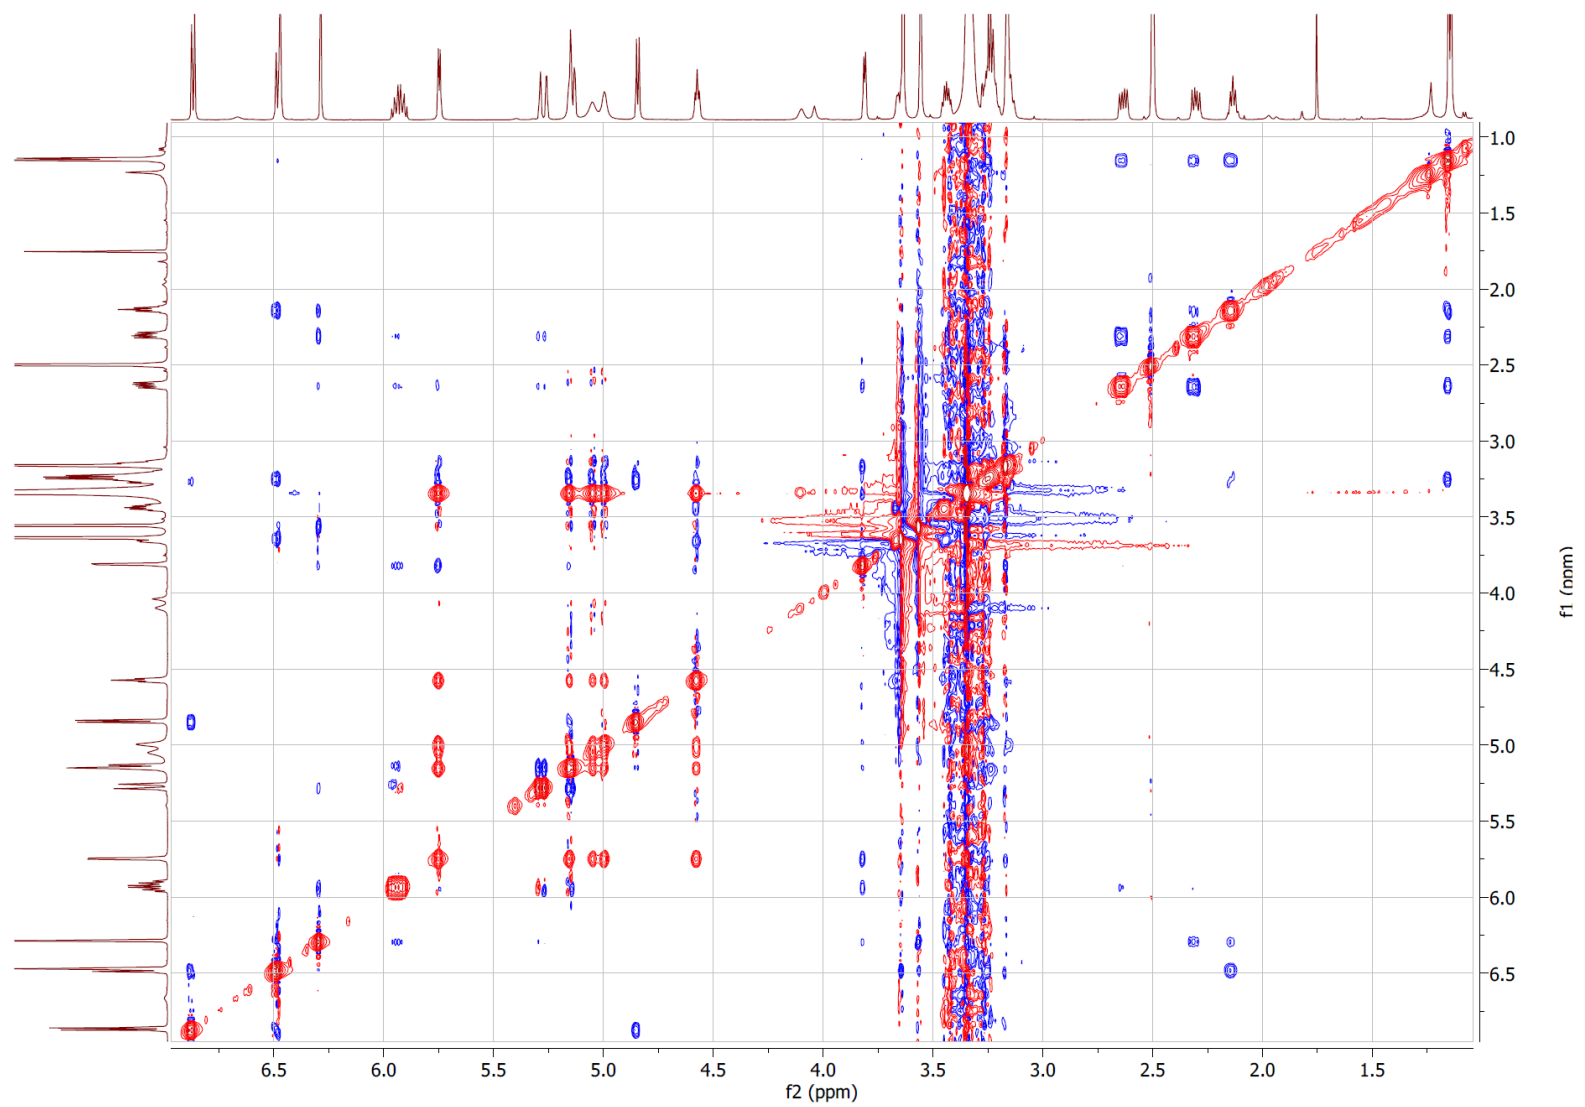

Figure S6. ROESY spectrum of compound

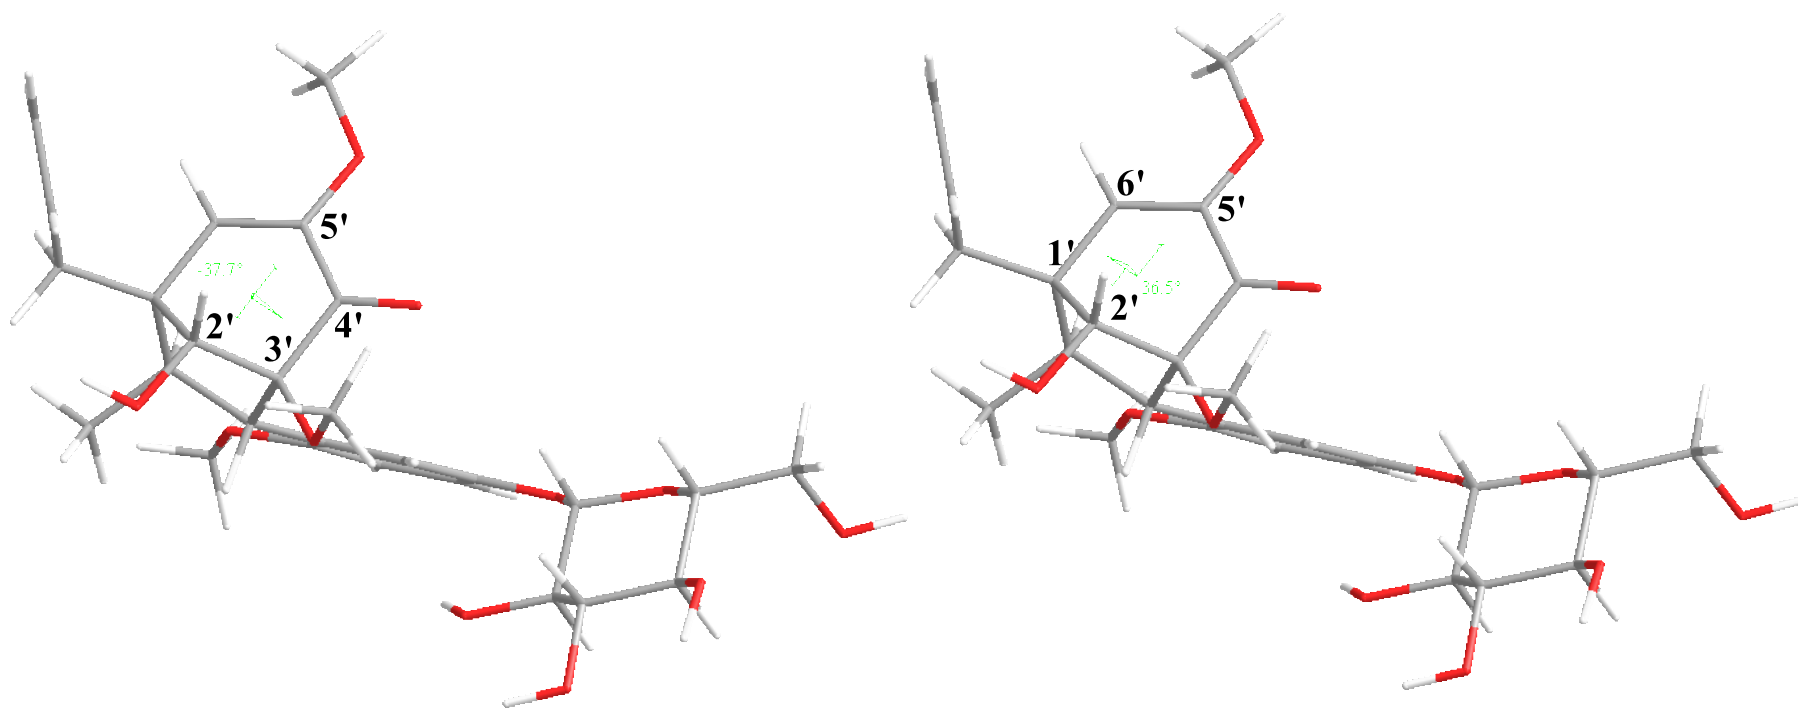

Figure S7. Adjacent torsion angles of compound 1

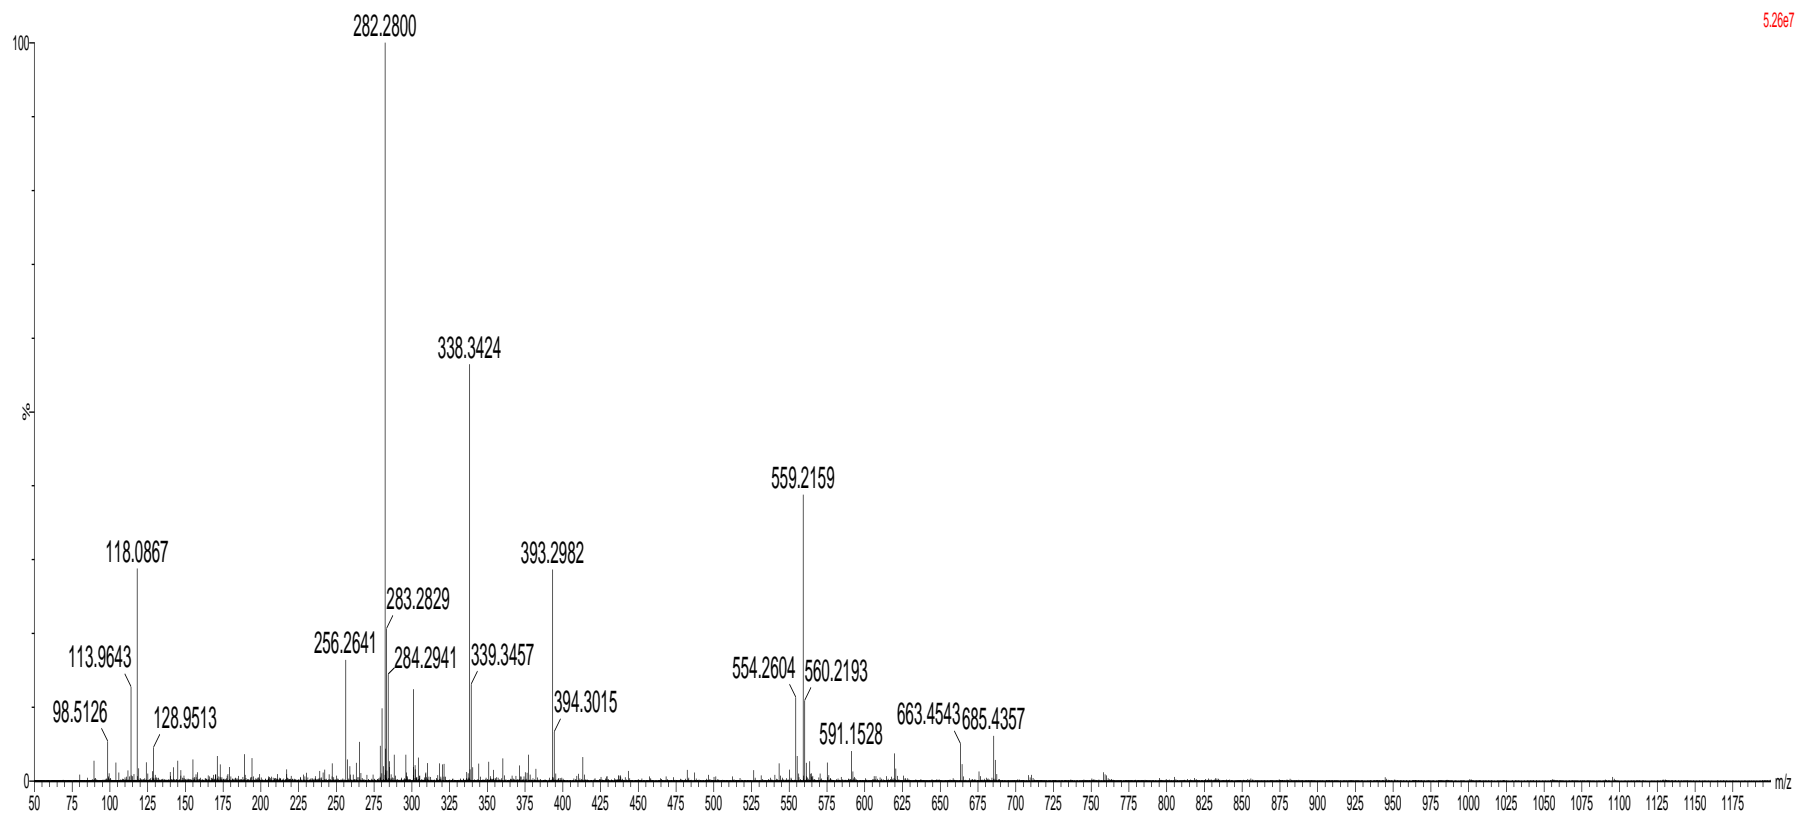

Figure S8. HR-ESI-MS spectrum of compound **1**

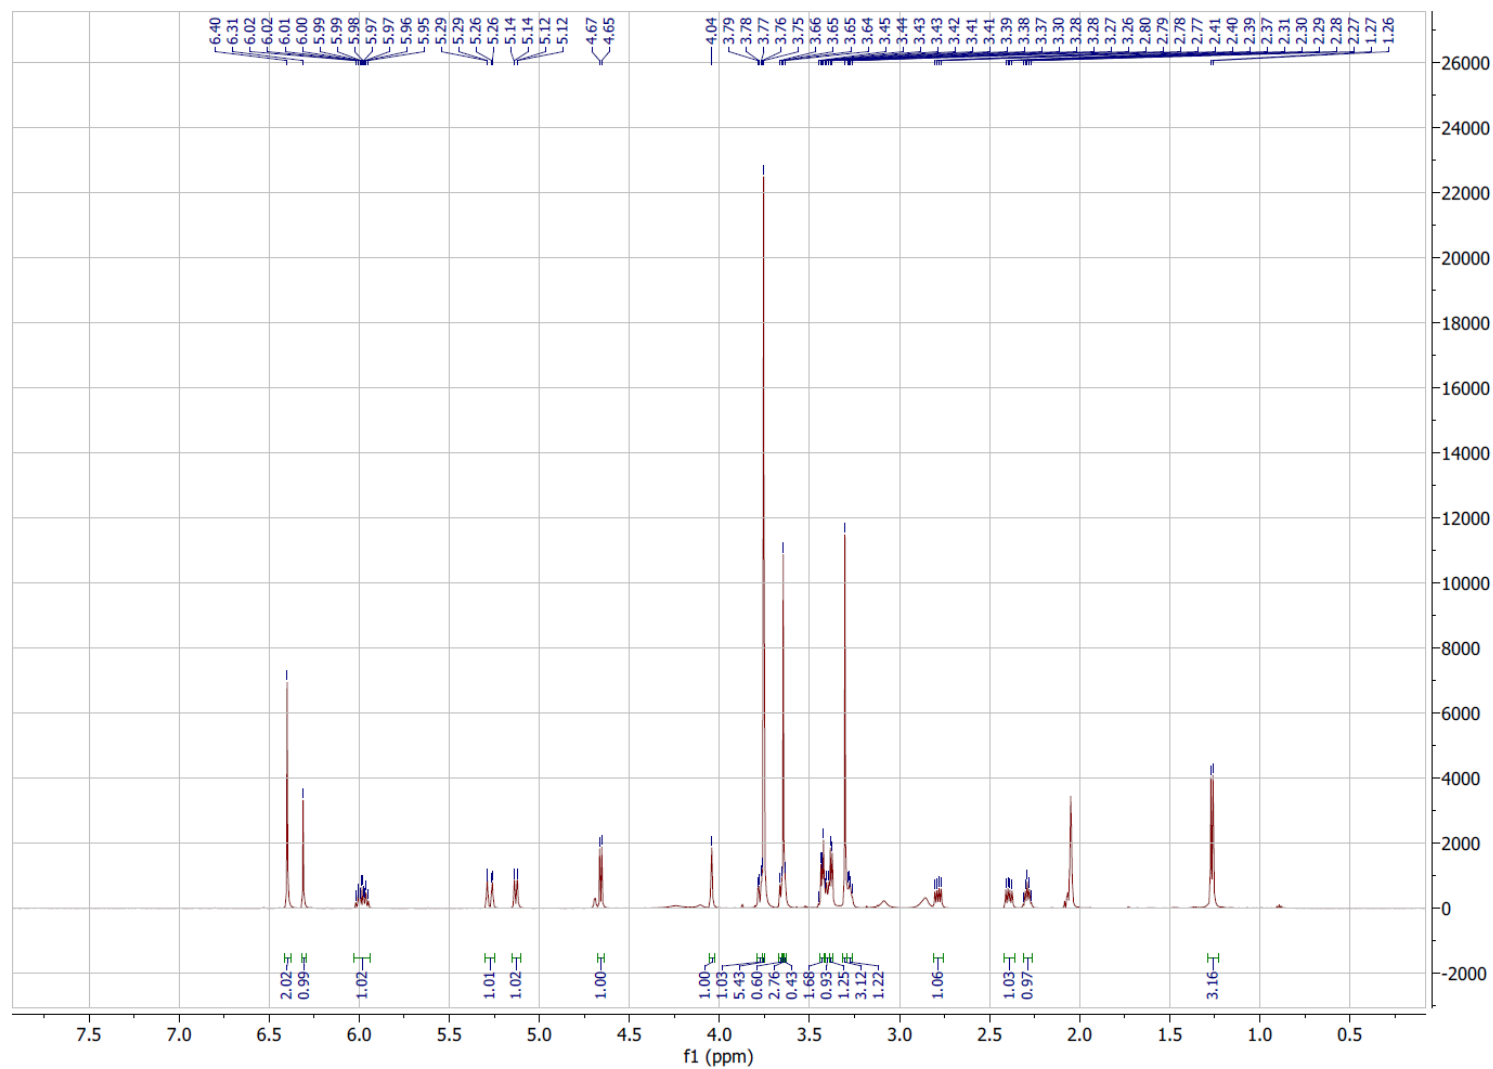

Figure S9. <sup>1</sup>H-NMR (600 MHz, acetone-*d*<sub>6</sub>) spectrum of compound **2**

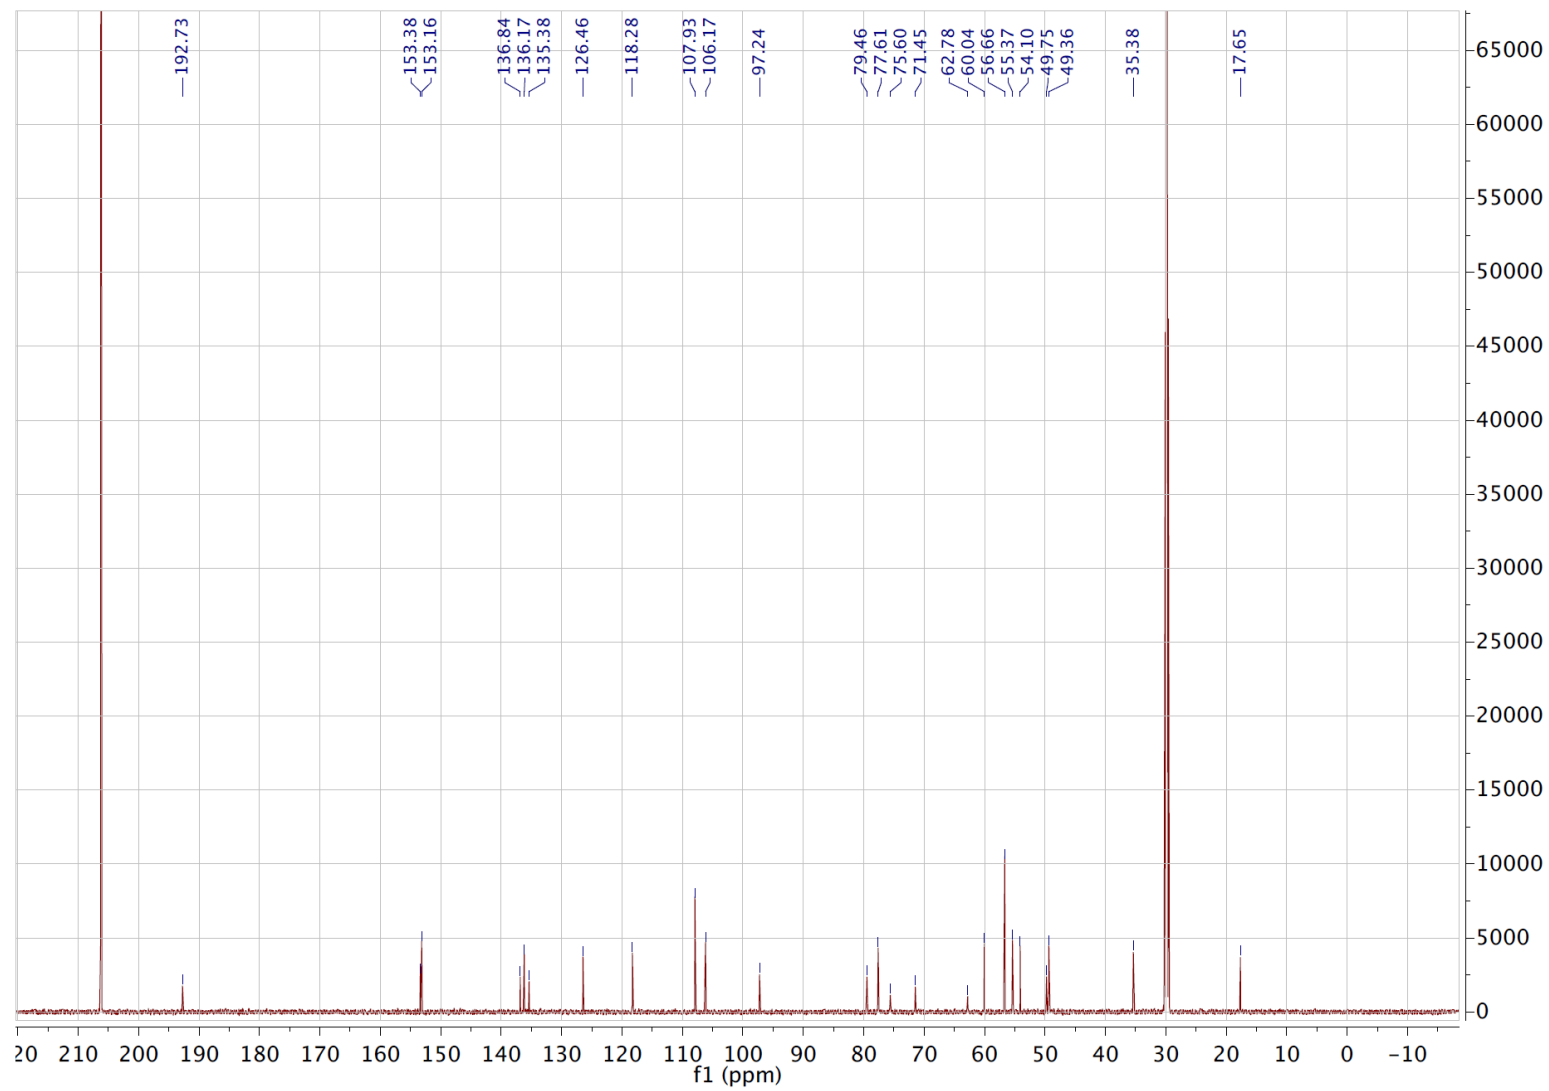

Figure S10.  $^{13}\text{C}$ -NMR (150 MHz, acetone- $d_6$ ) spectrum of compound **2**

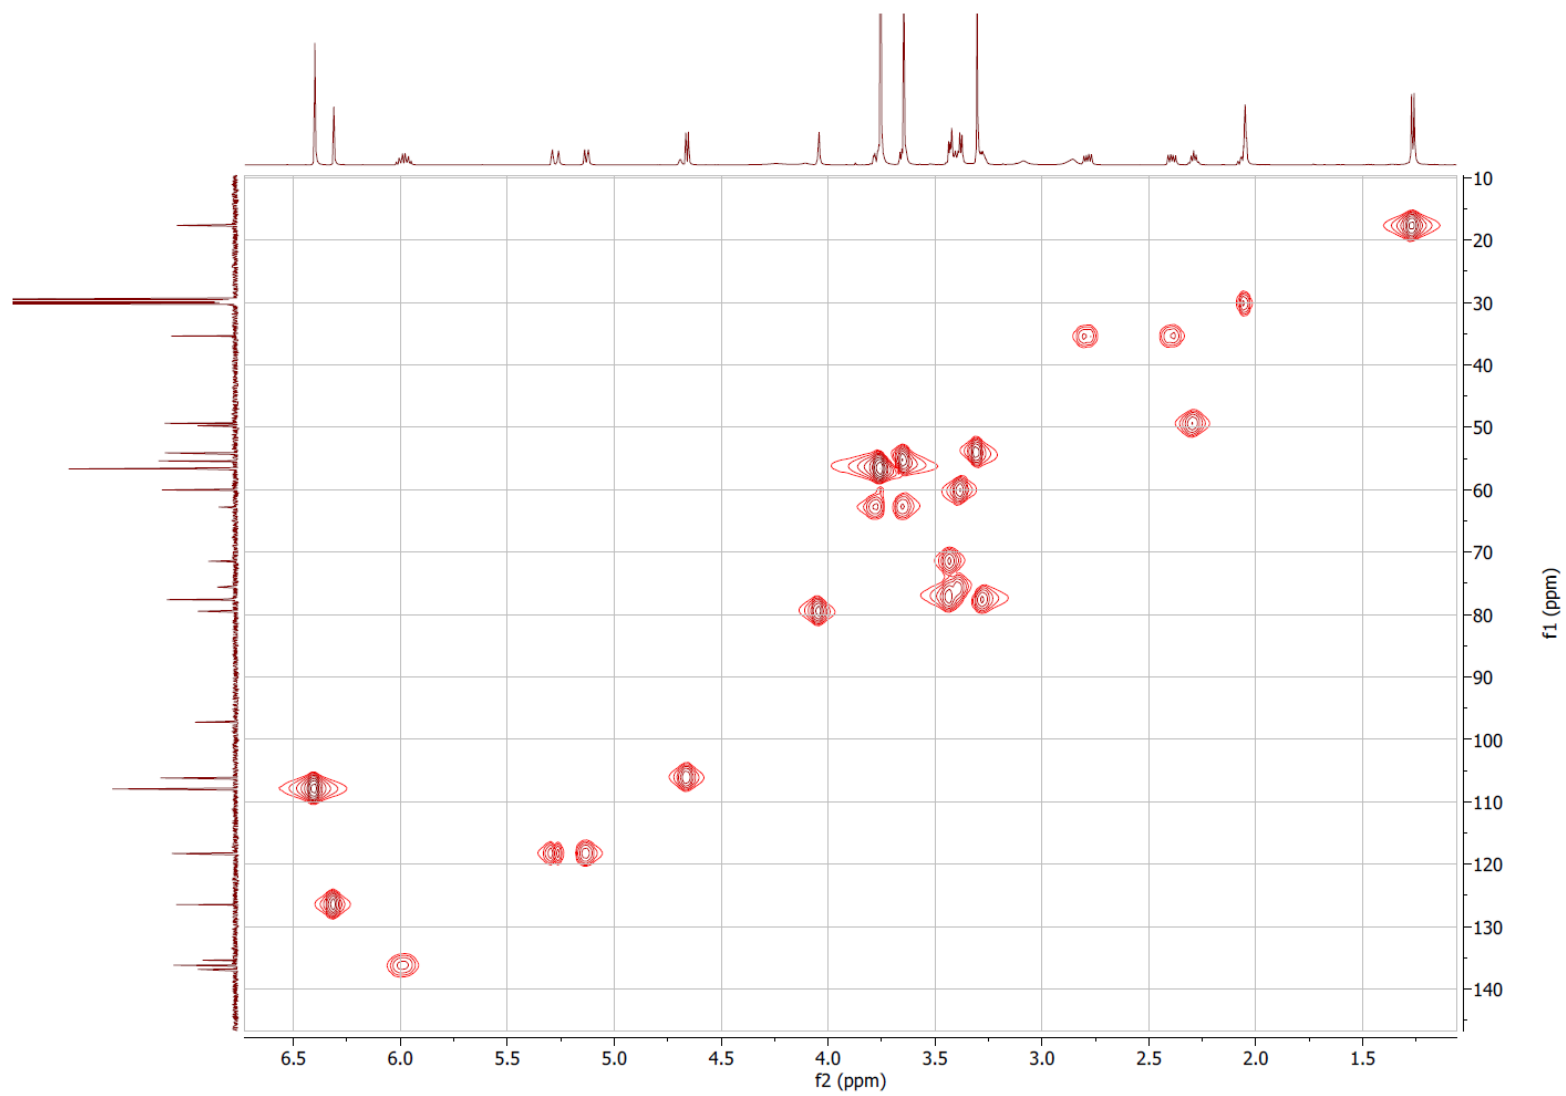

Figure S11. HSQC spectrum of compound

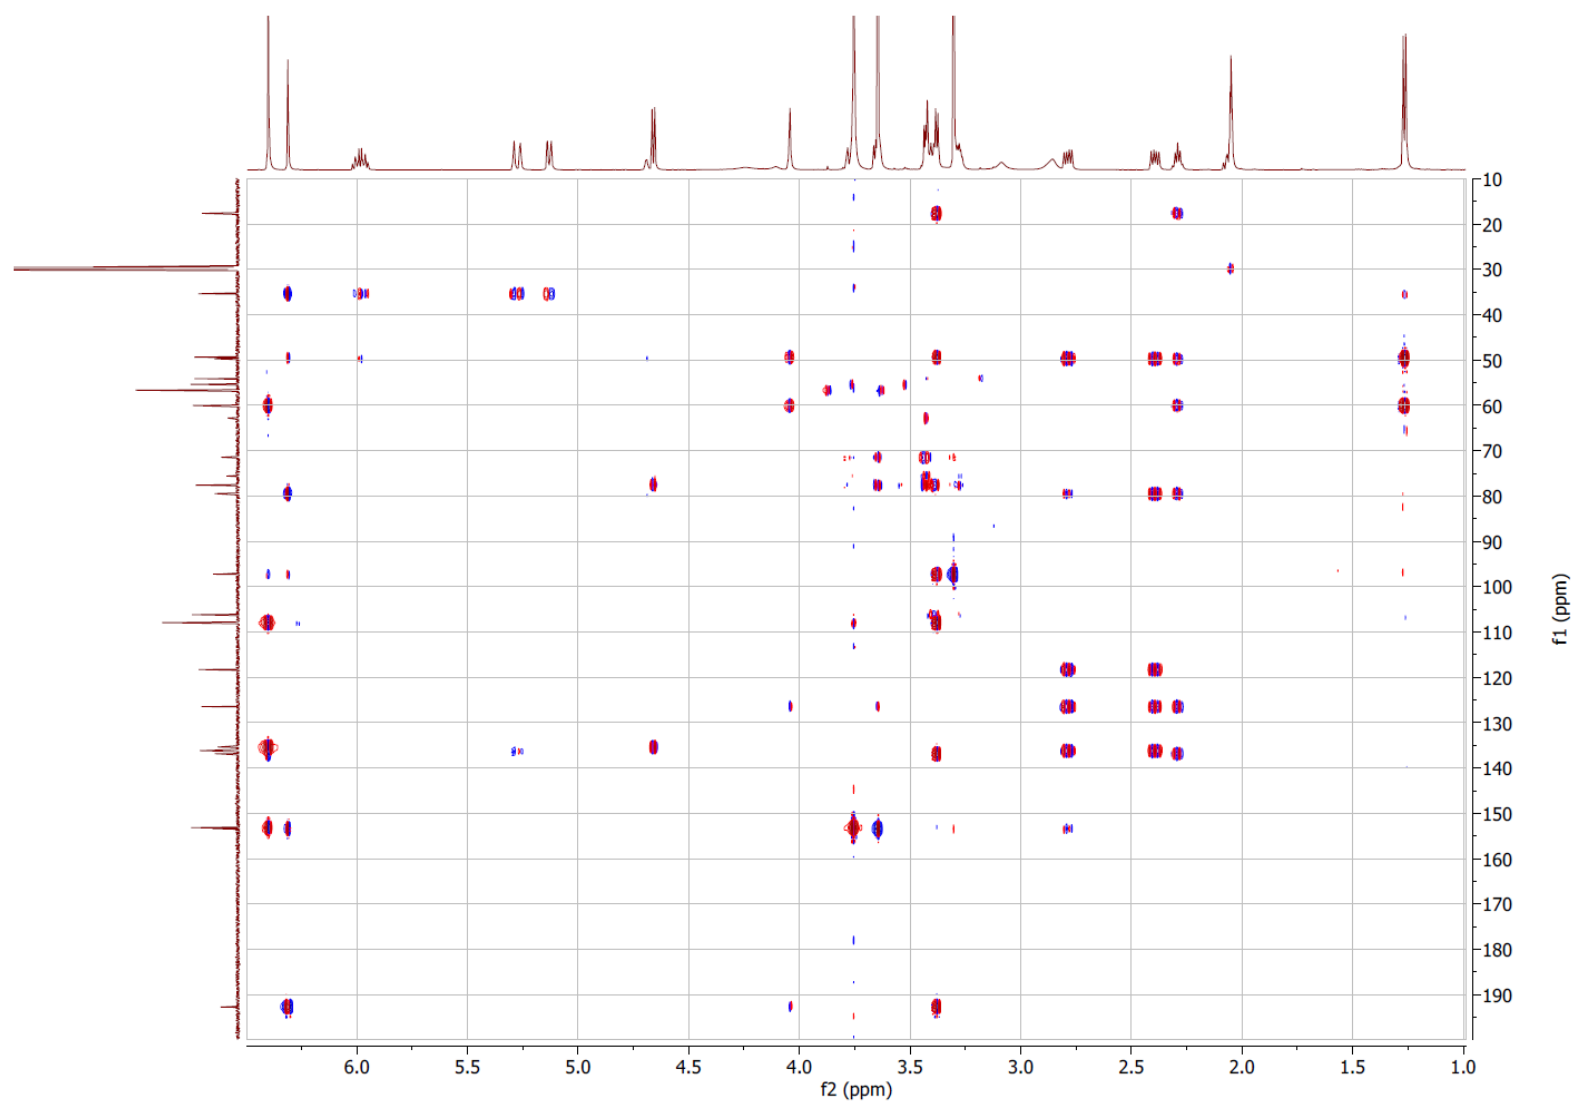

Figure S12. HMBC spectrum of compound

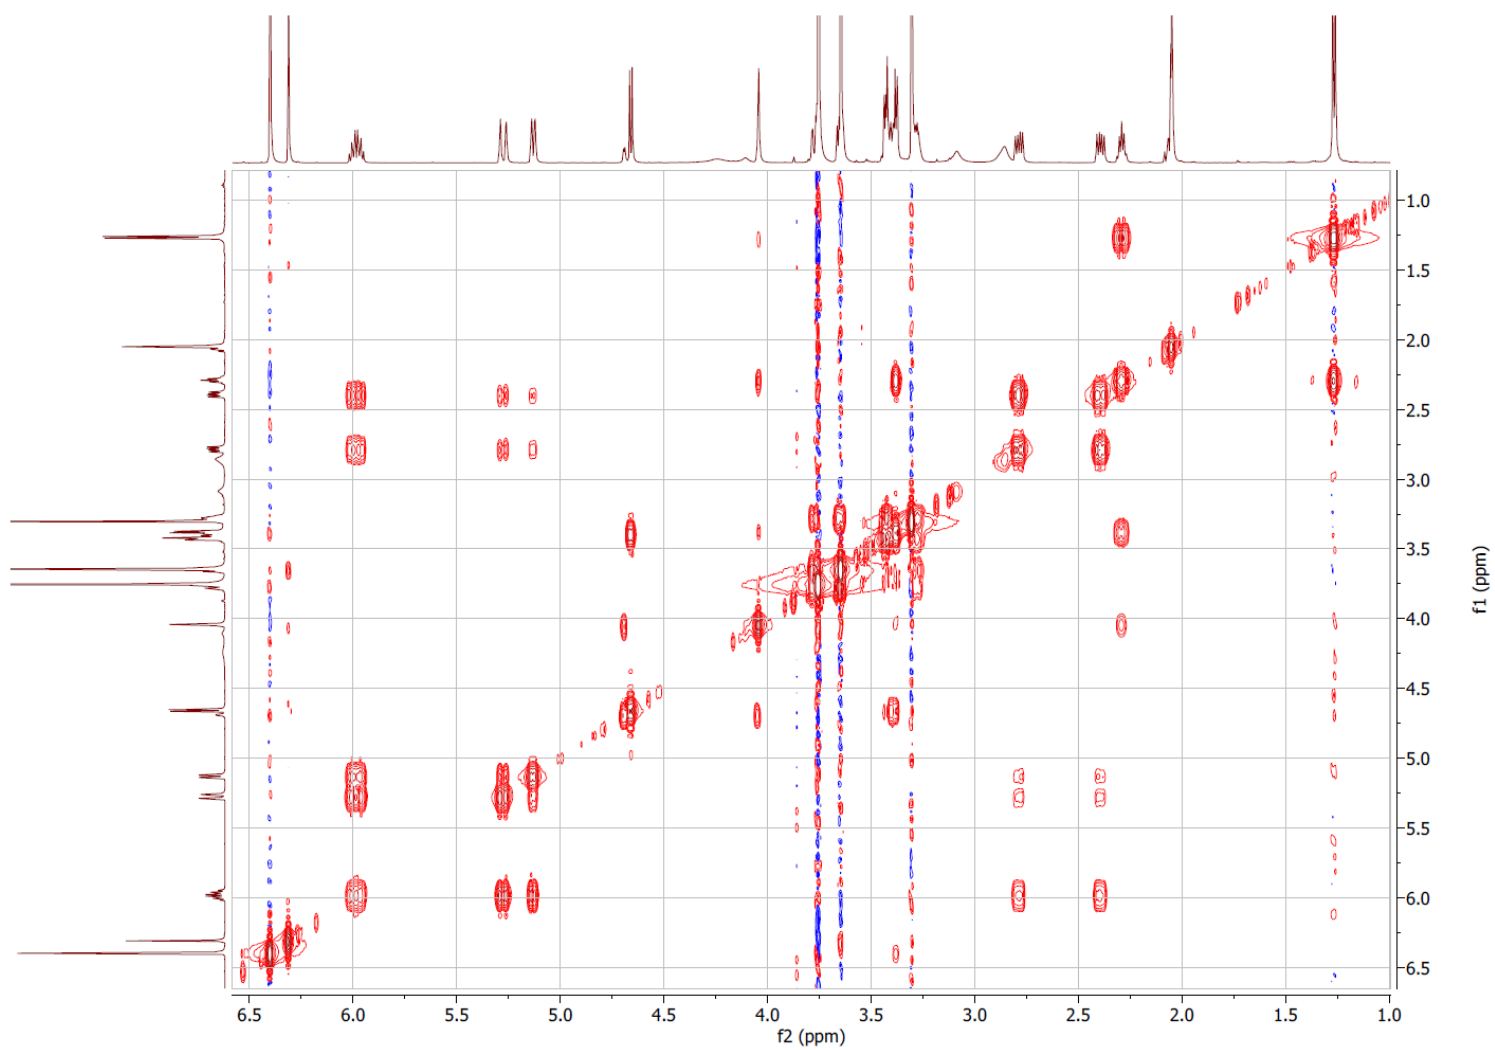

Figure S13. COSY spectrum of compound

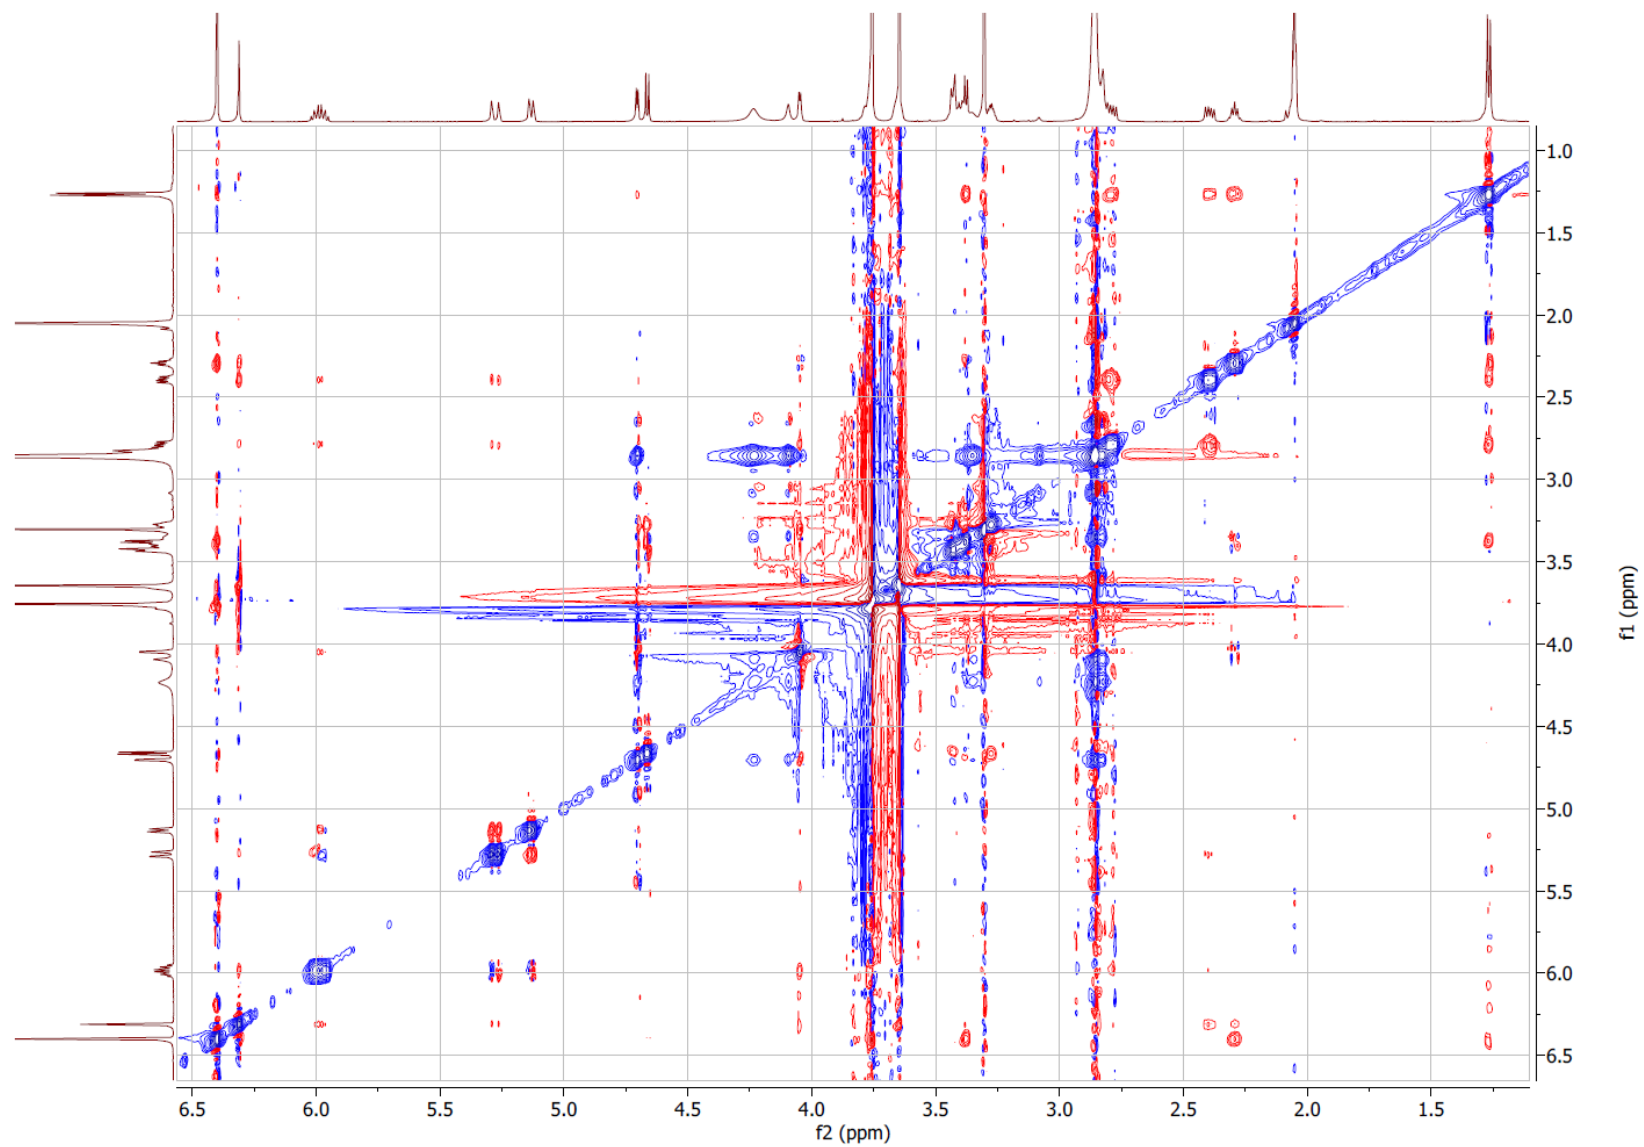

Figure S14. ROESY spectrum of compound

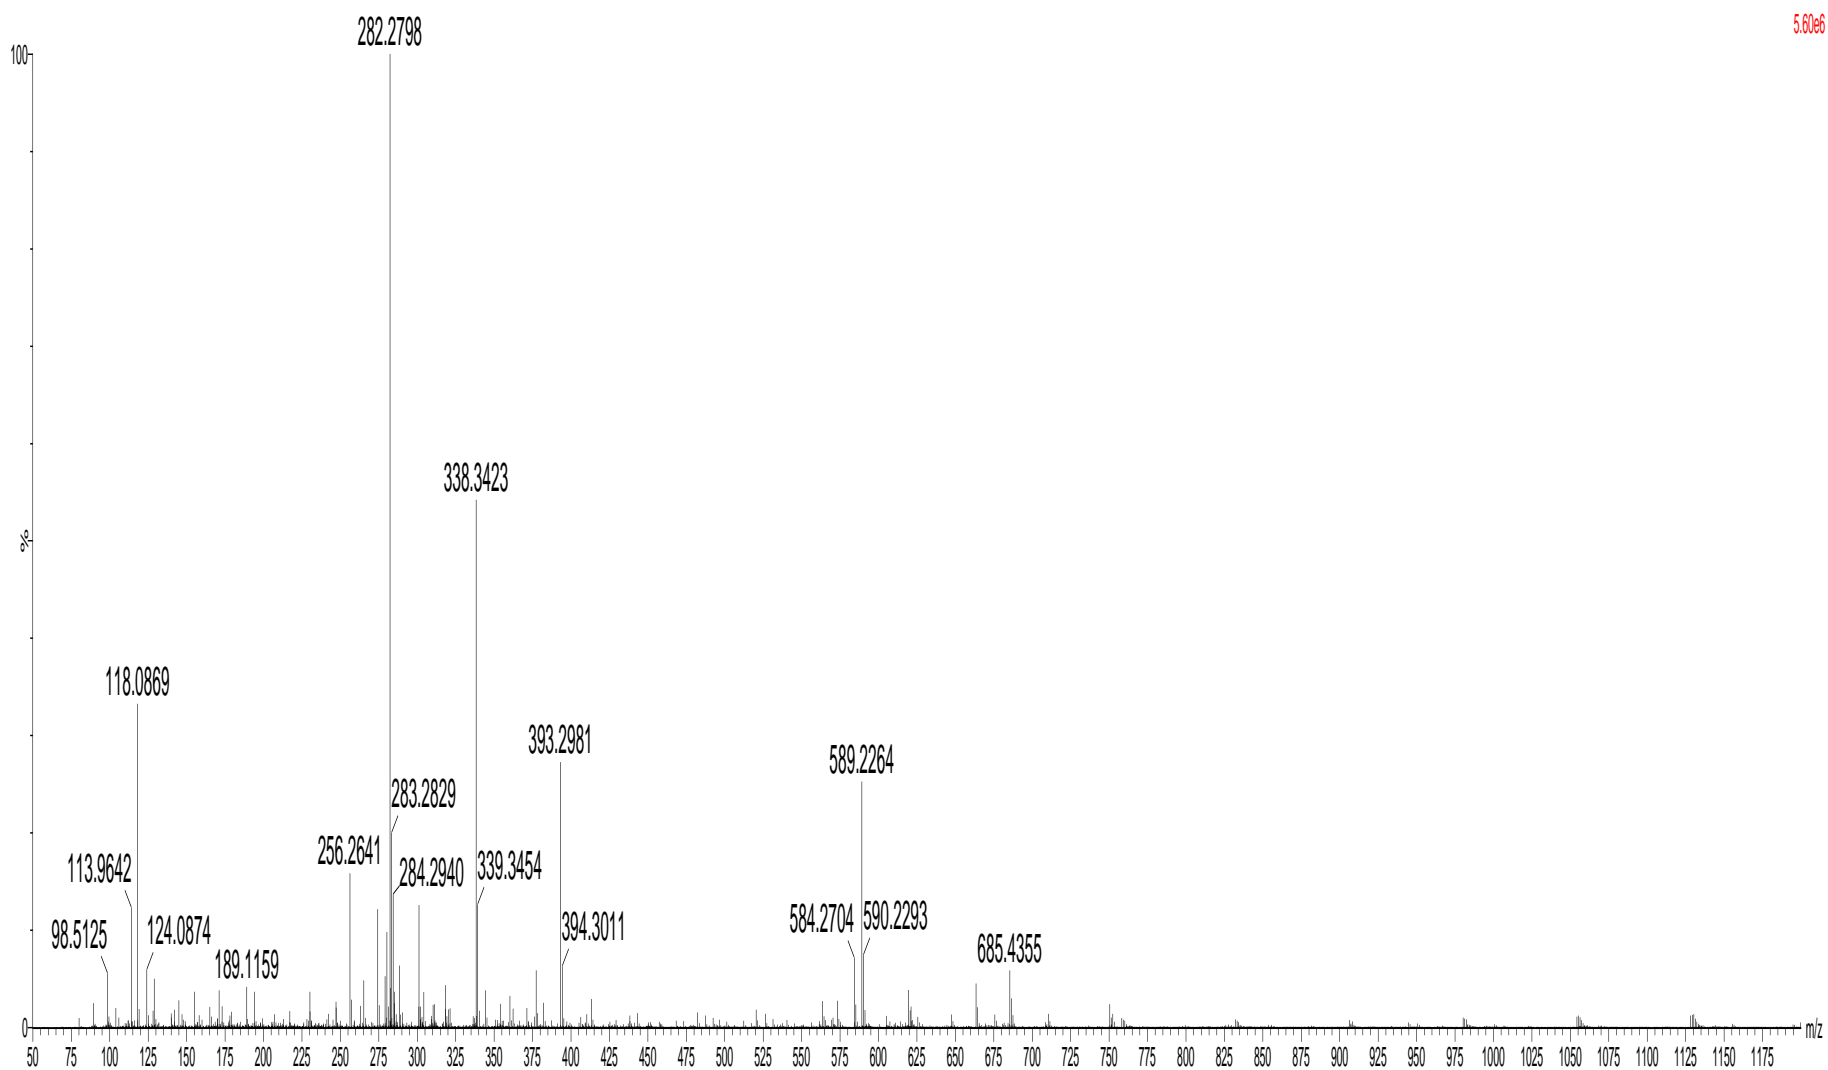

Figure S15. HR-ESI-MS spectrum of compound 2

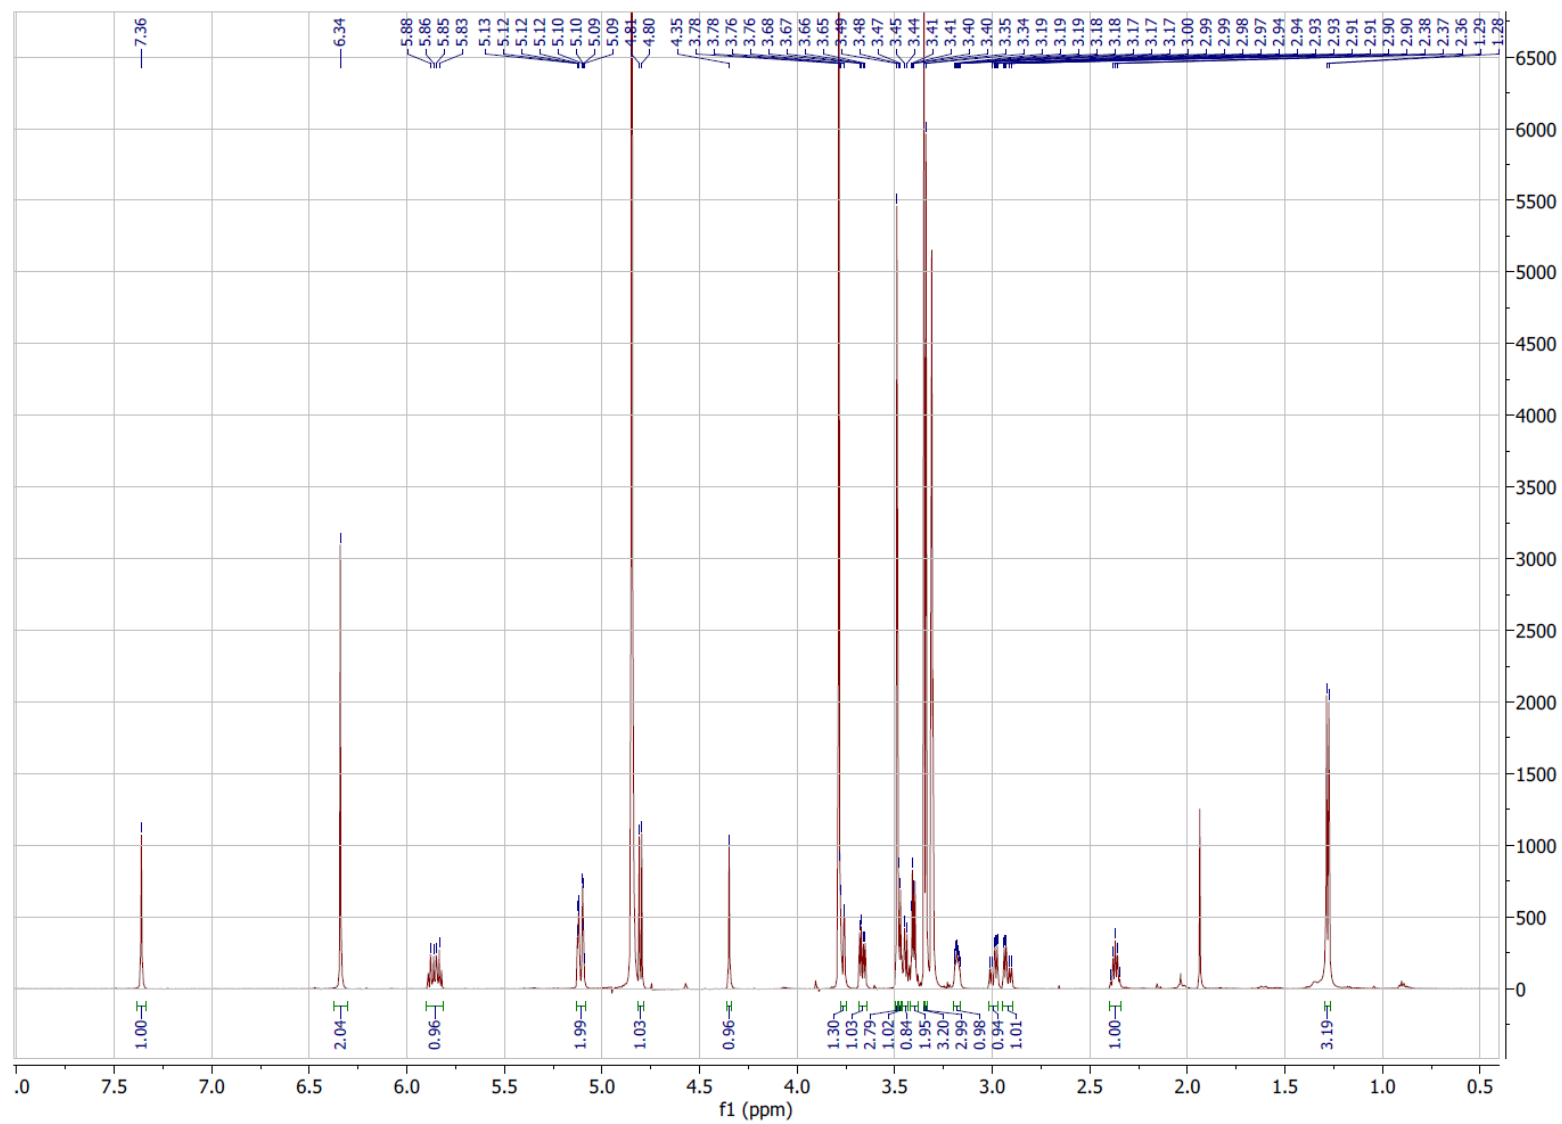

Figure S16.  $^1\text{H}$ -NMR (600 MHz, methanol- $d_4$ ) spectrum of compound

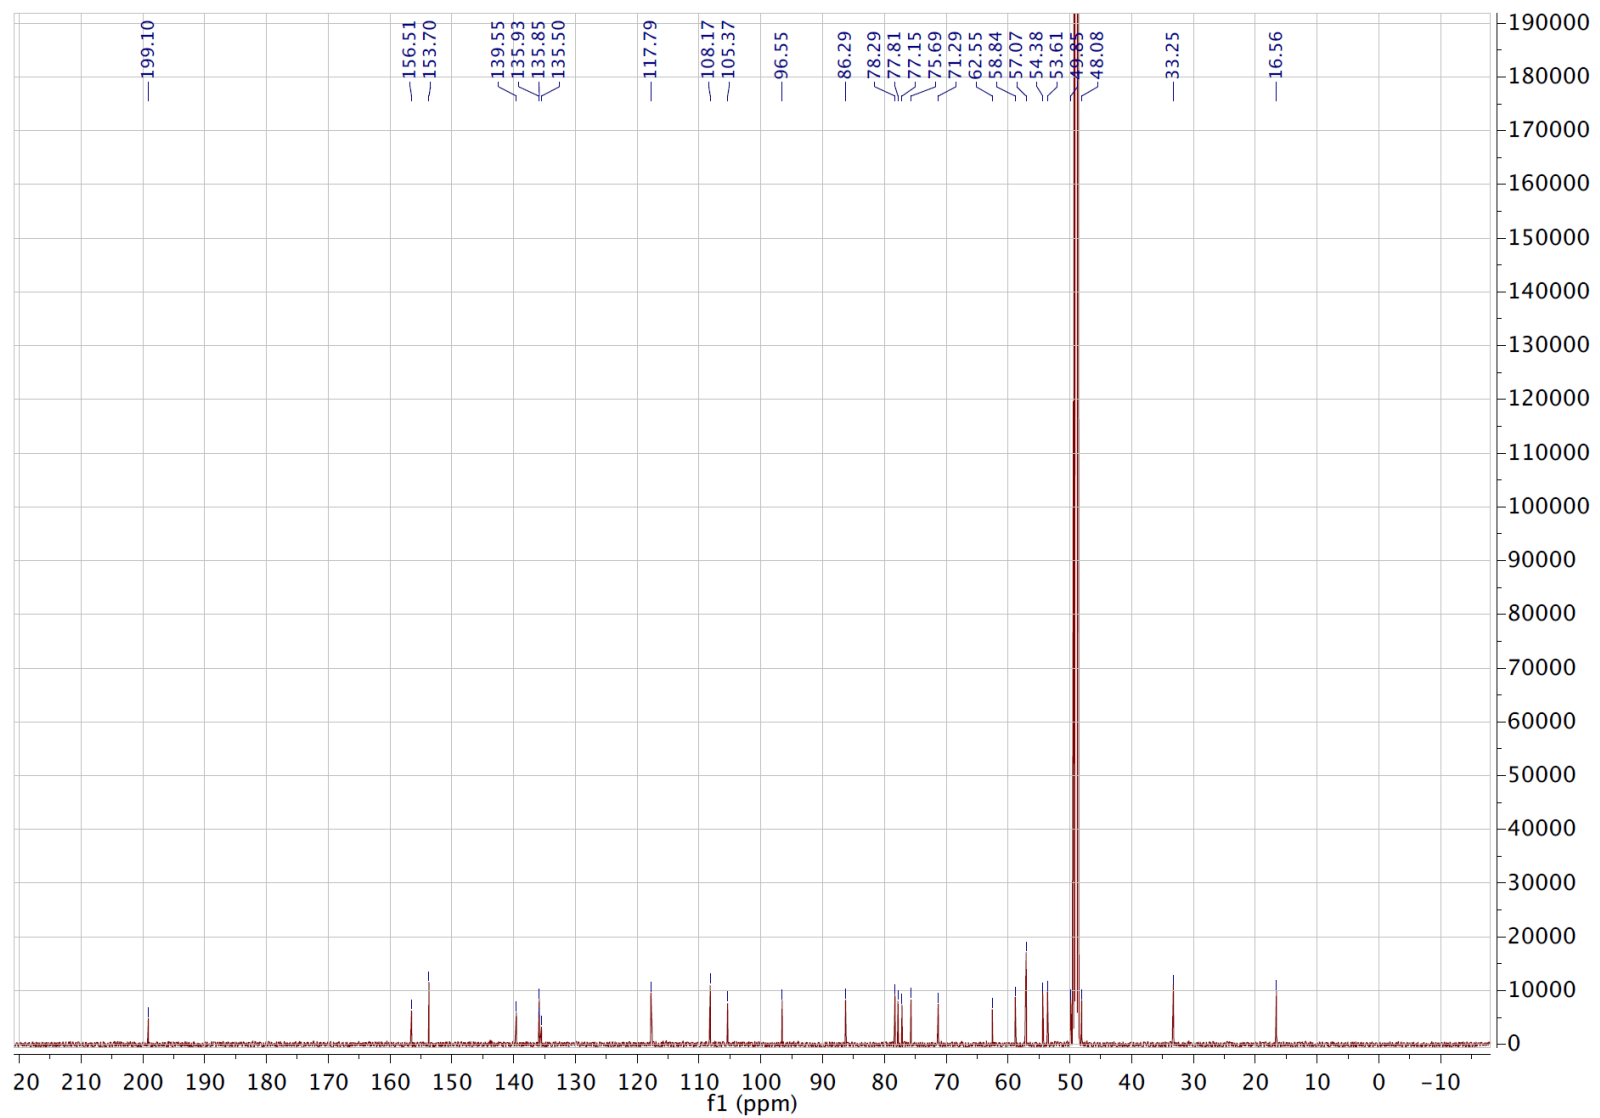

Figure S17. <sup>13</sup>C-NMR (150 MHz, methanol-*d*<sub>4</sub>) spectrum of compound **3**

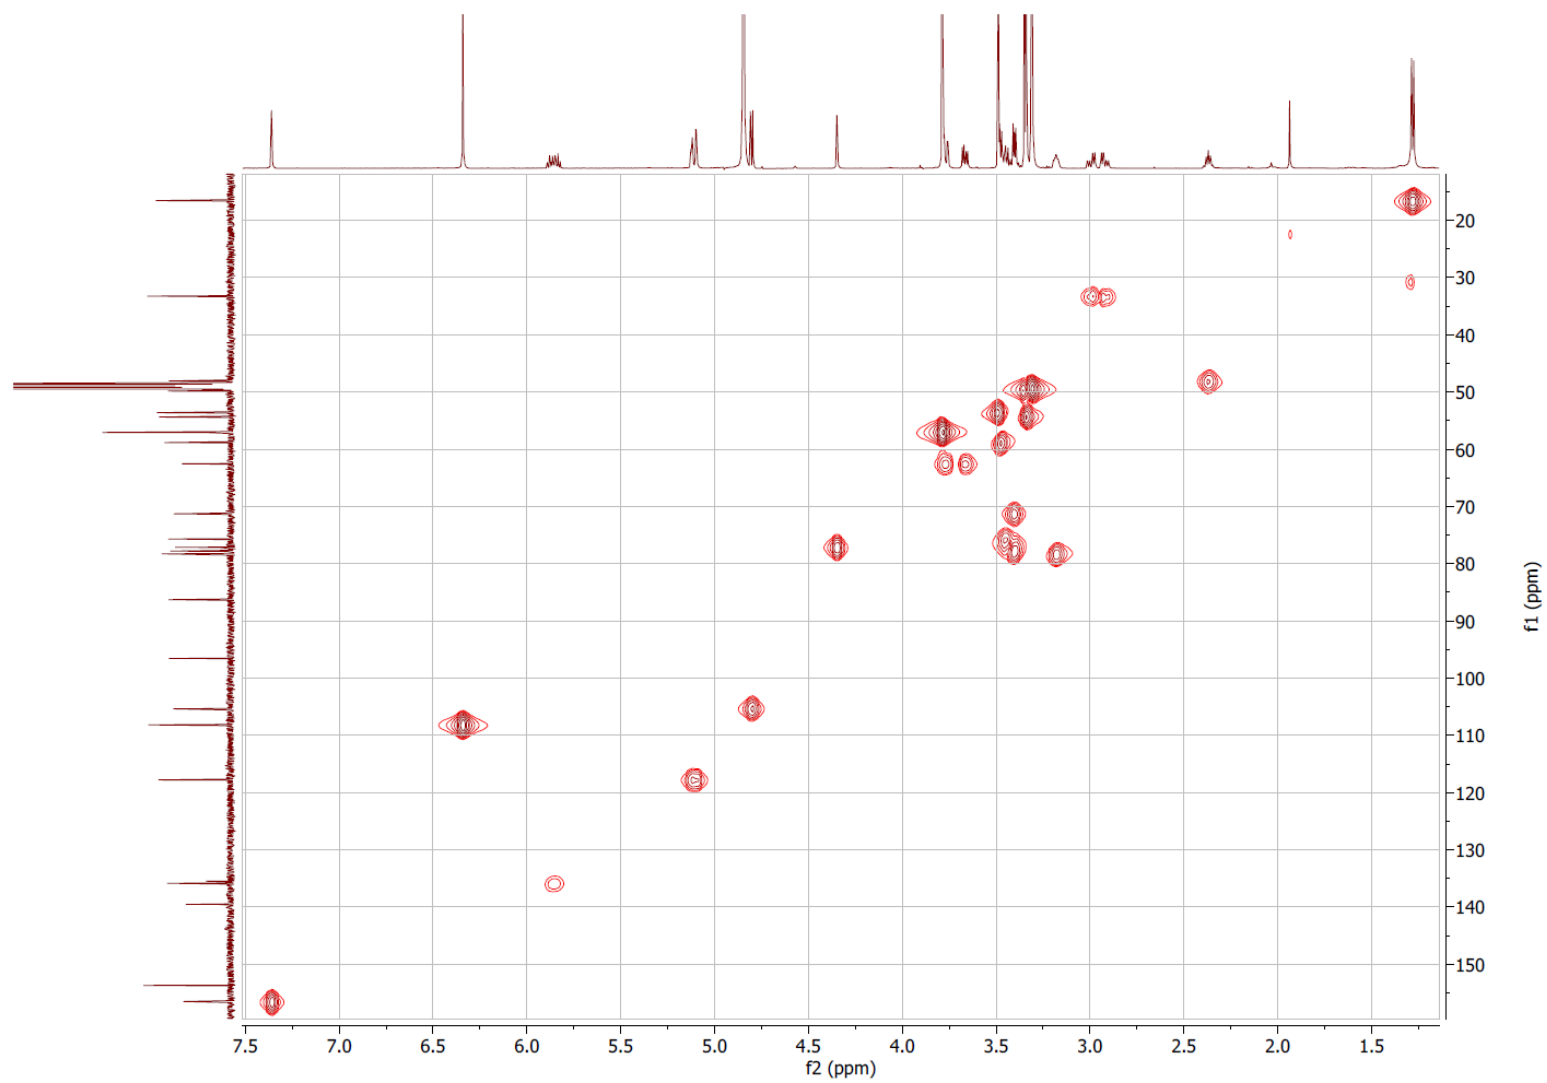

Figure S18. HSQC spectrum of compound

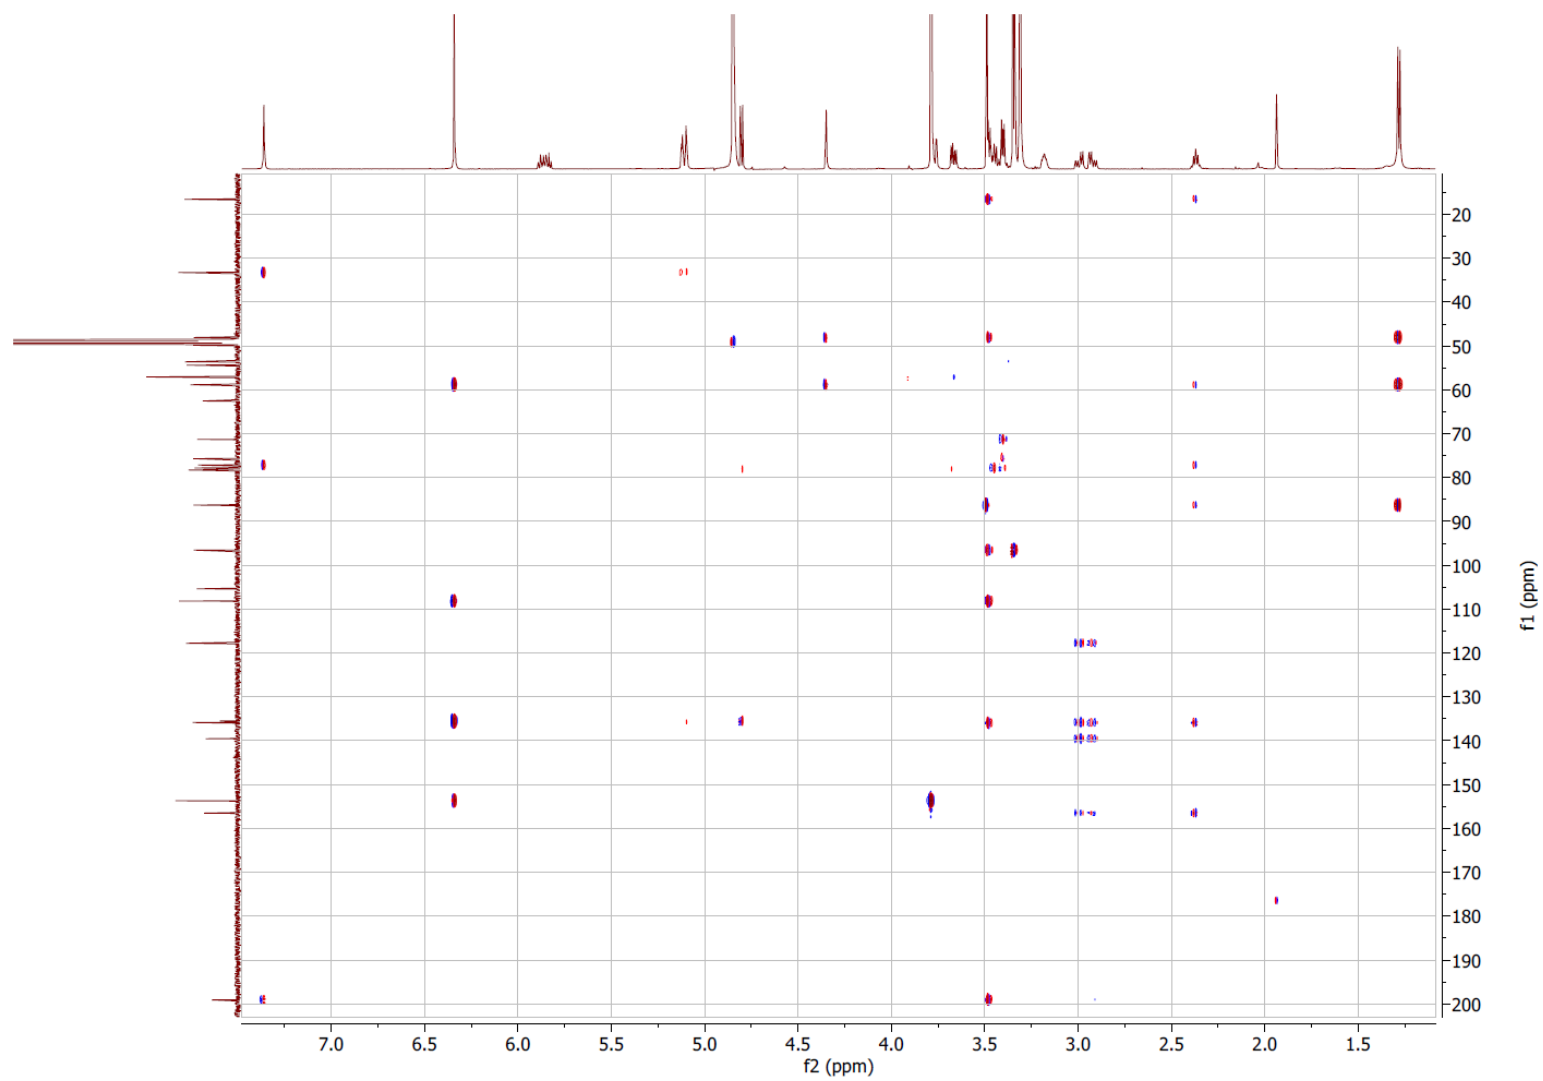

Figure S19. HMBC spectrum of compound

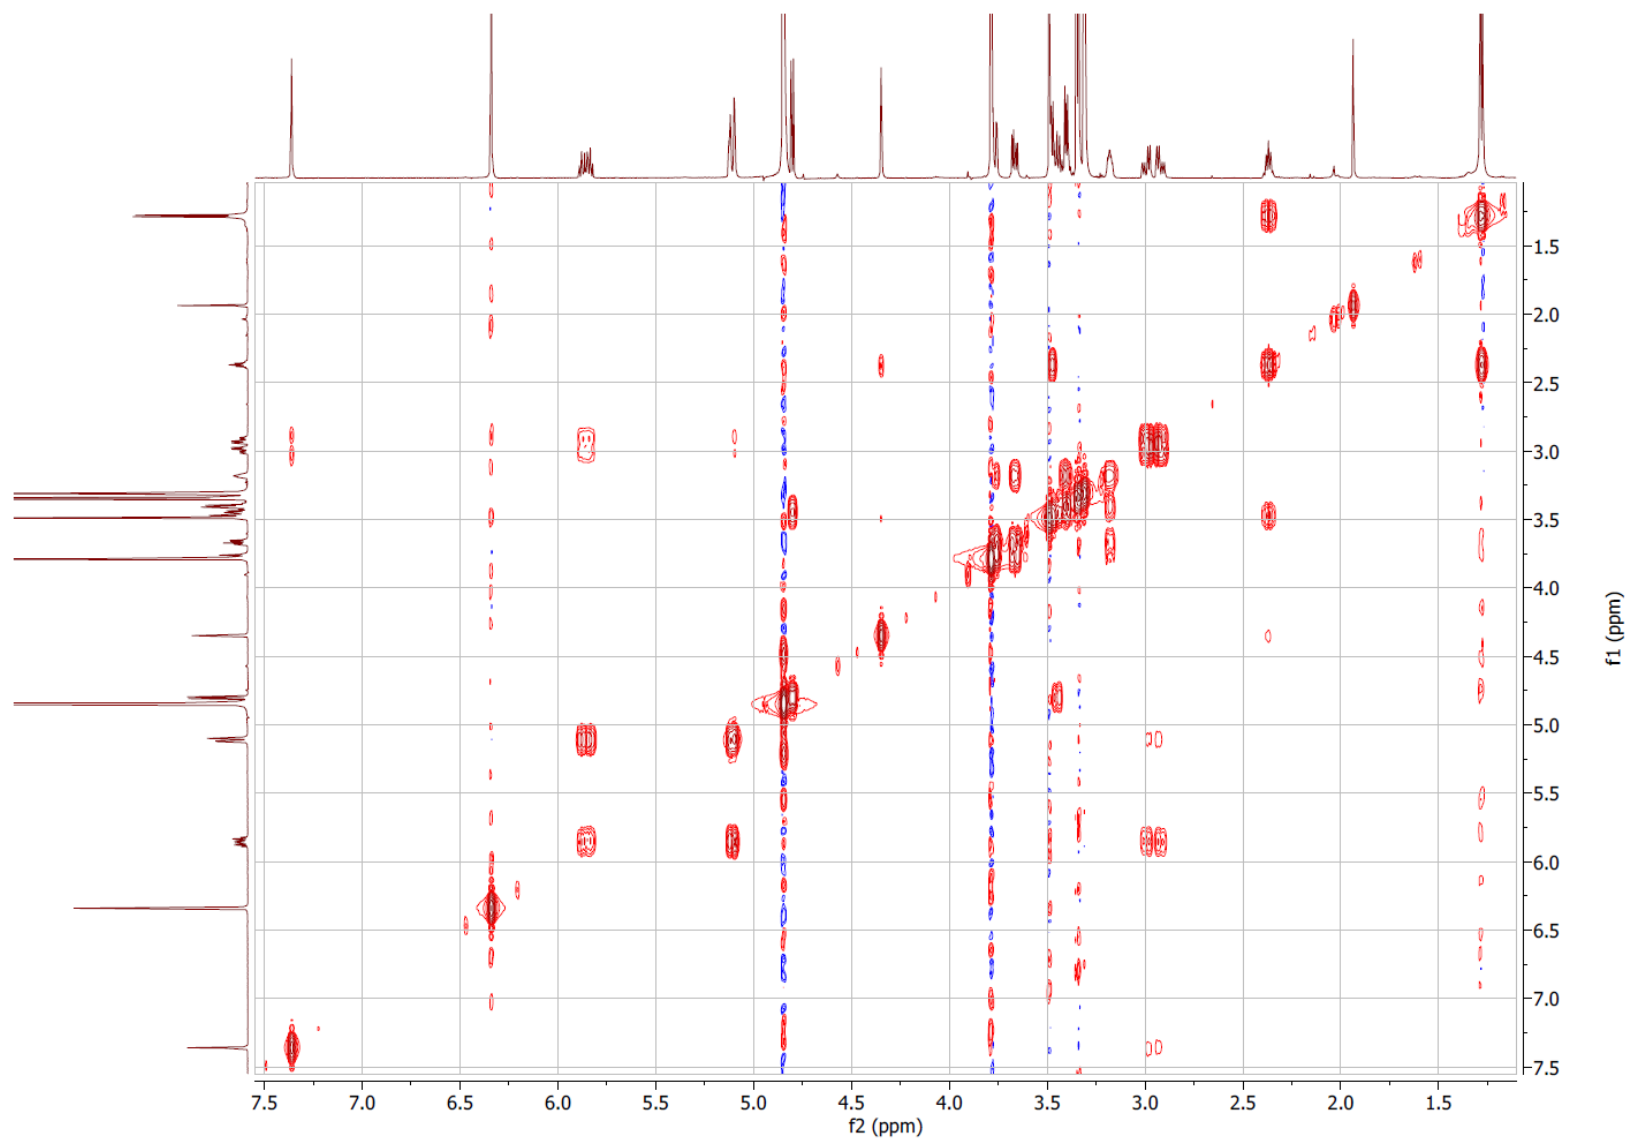

Figure S20. COSY spectrum of compound

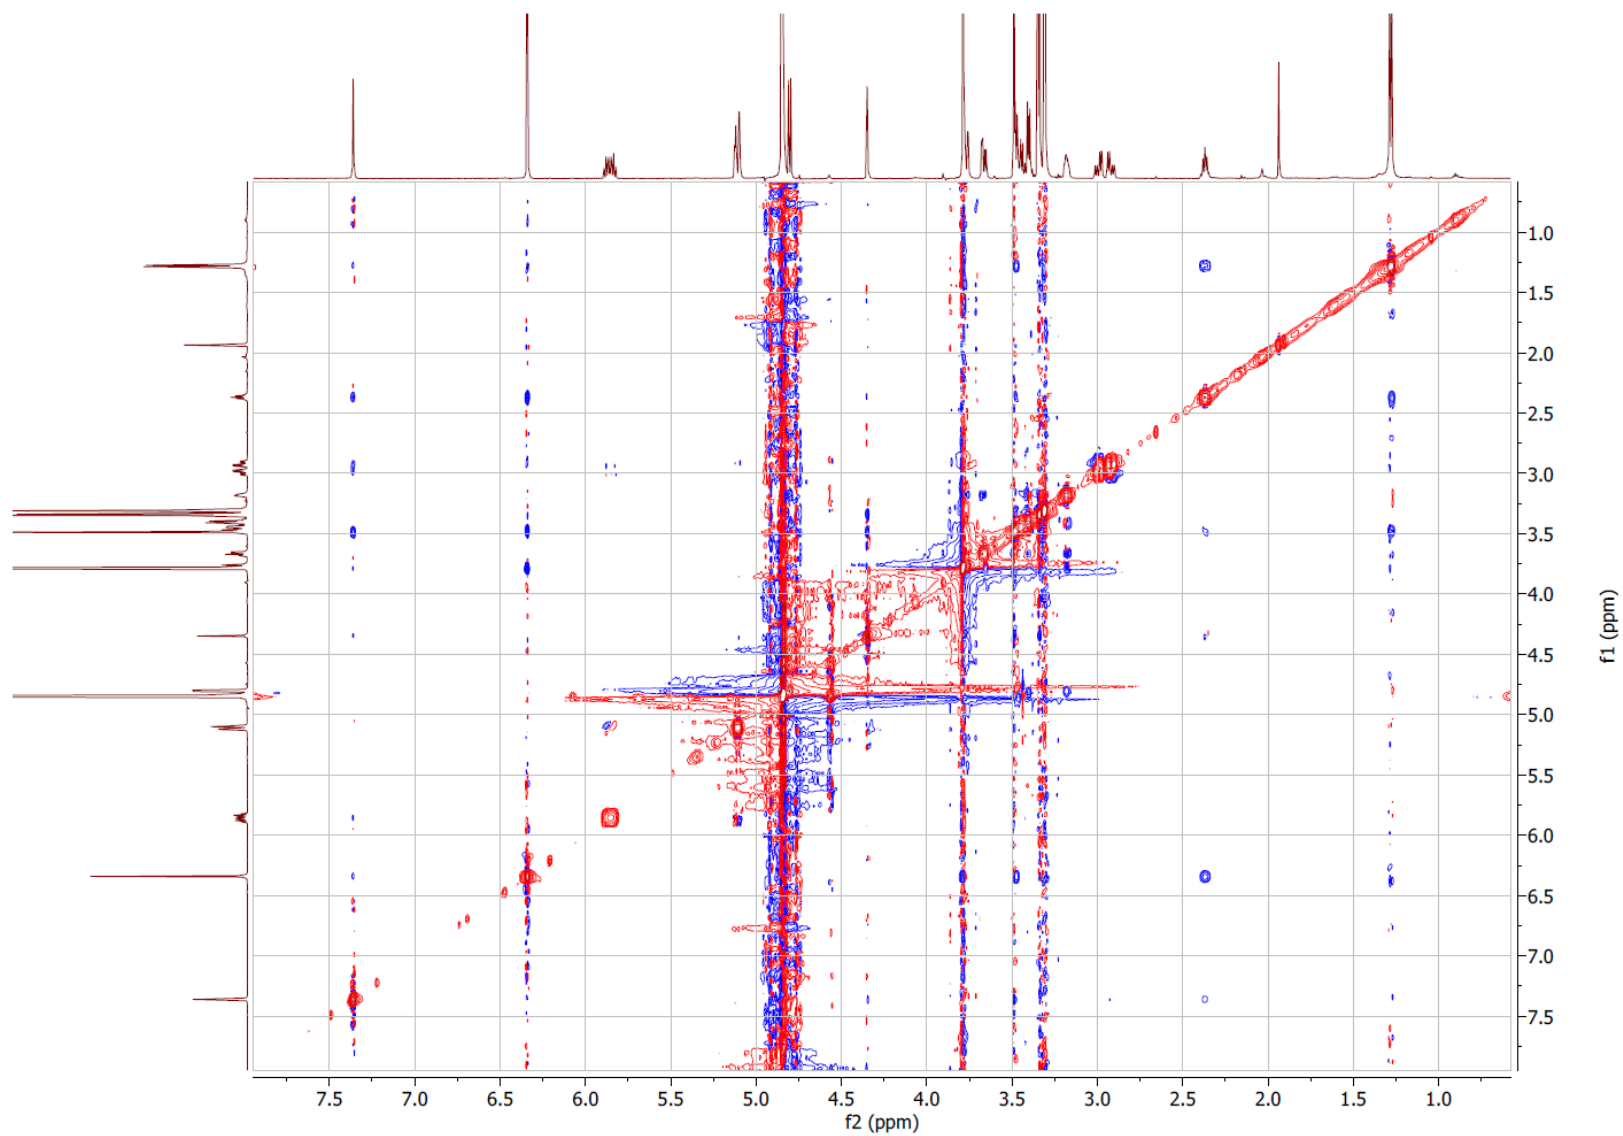

Figure S21. ROESY spectrum of compound

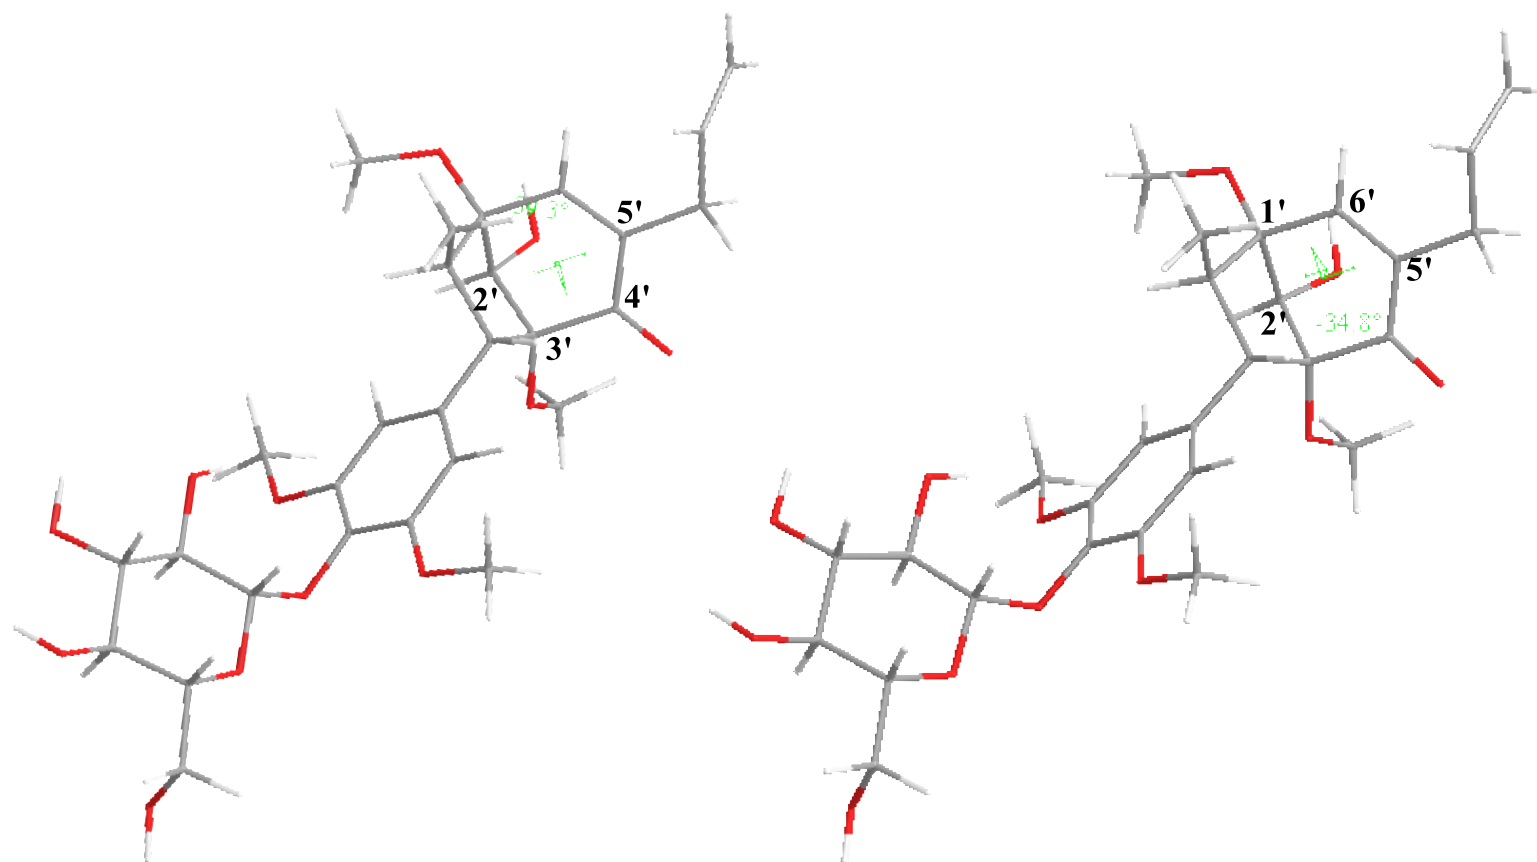

Figure S22. Adjacent torsion angles of compound

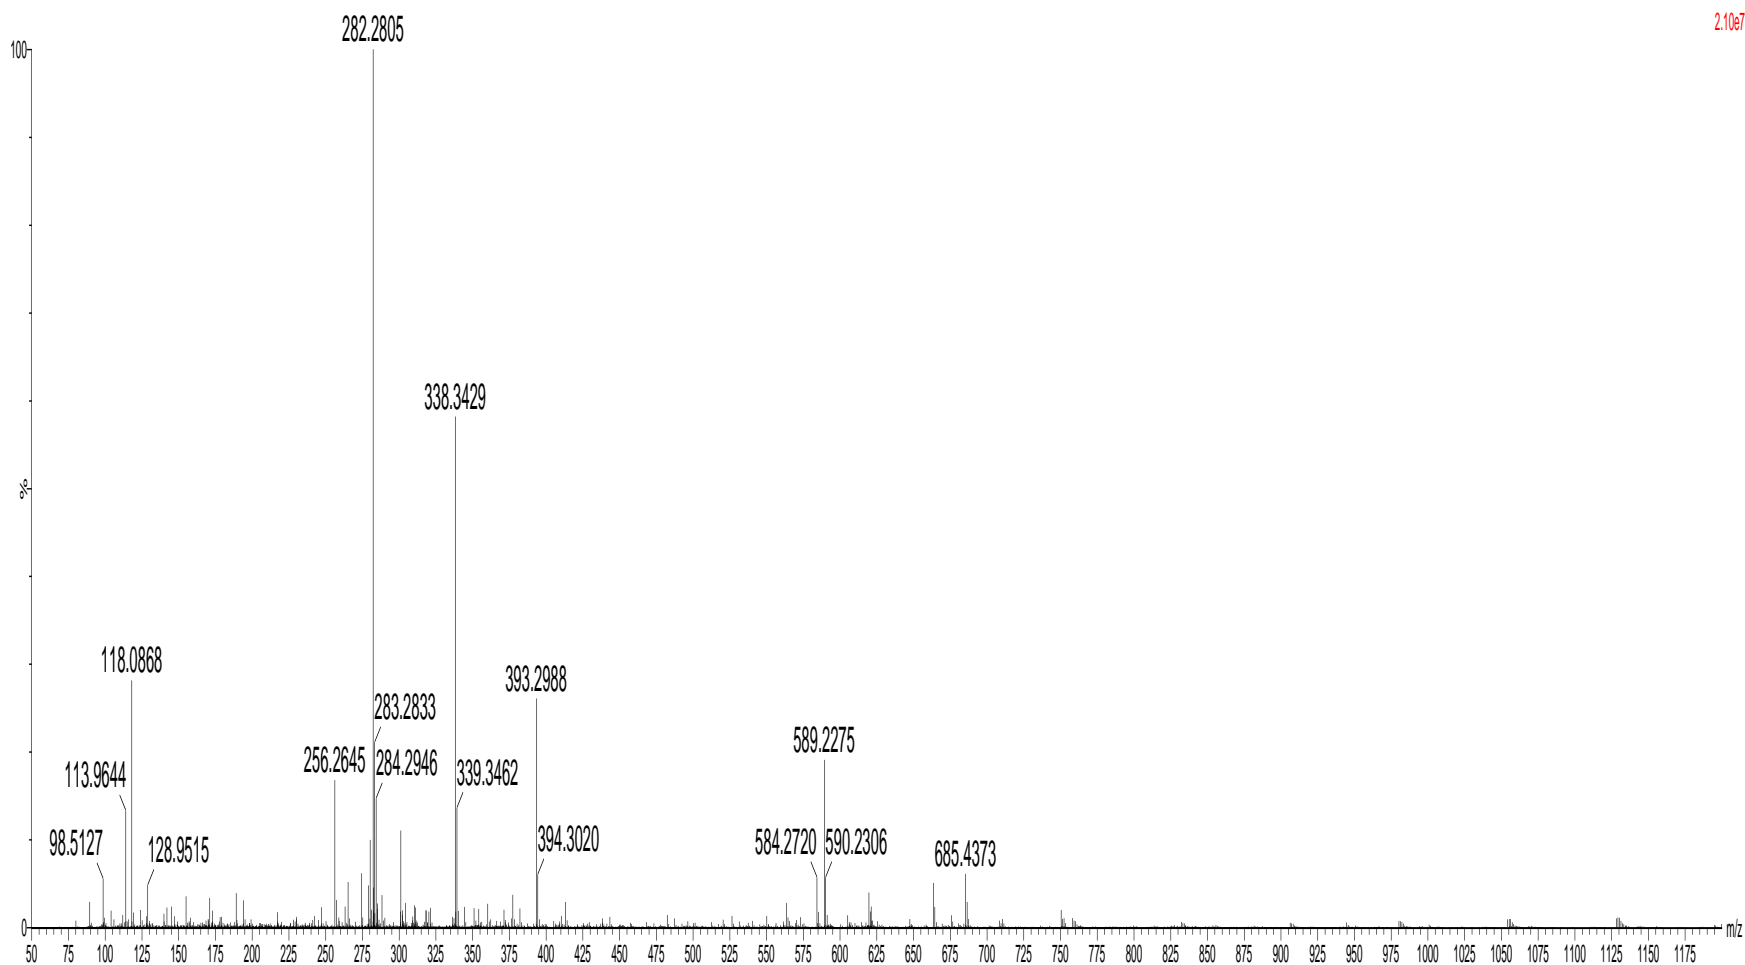

Figure S23. HR-ESI-MS spectrum of compound **3**

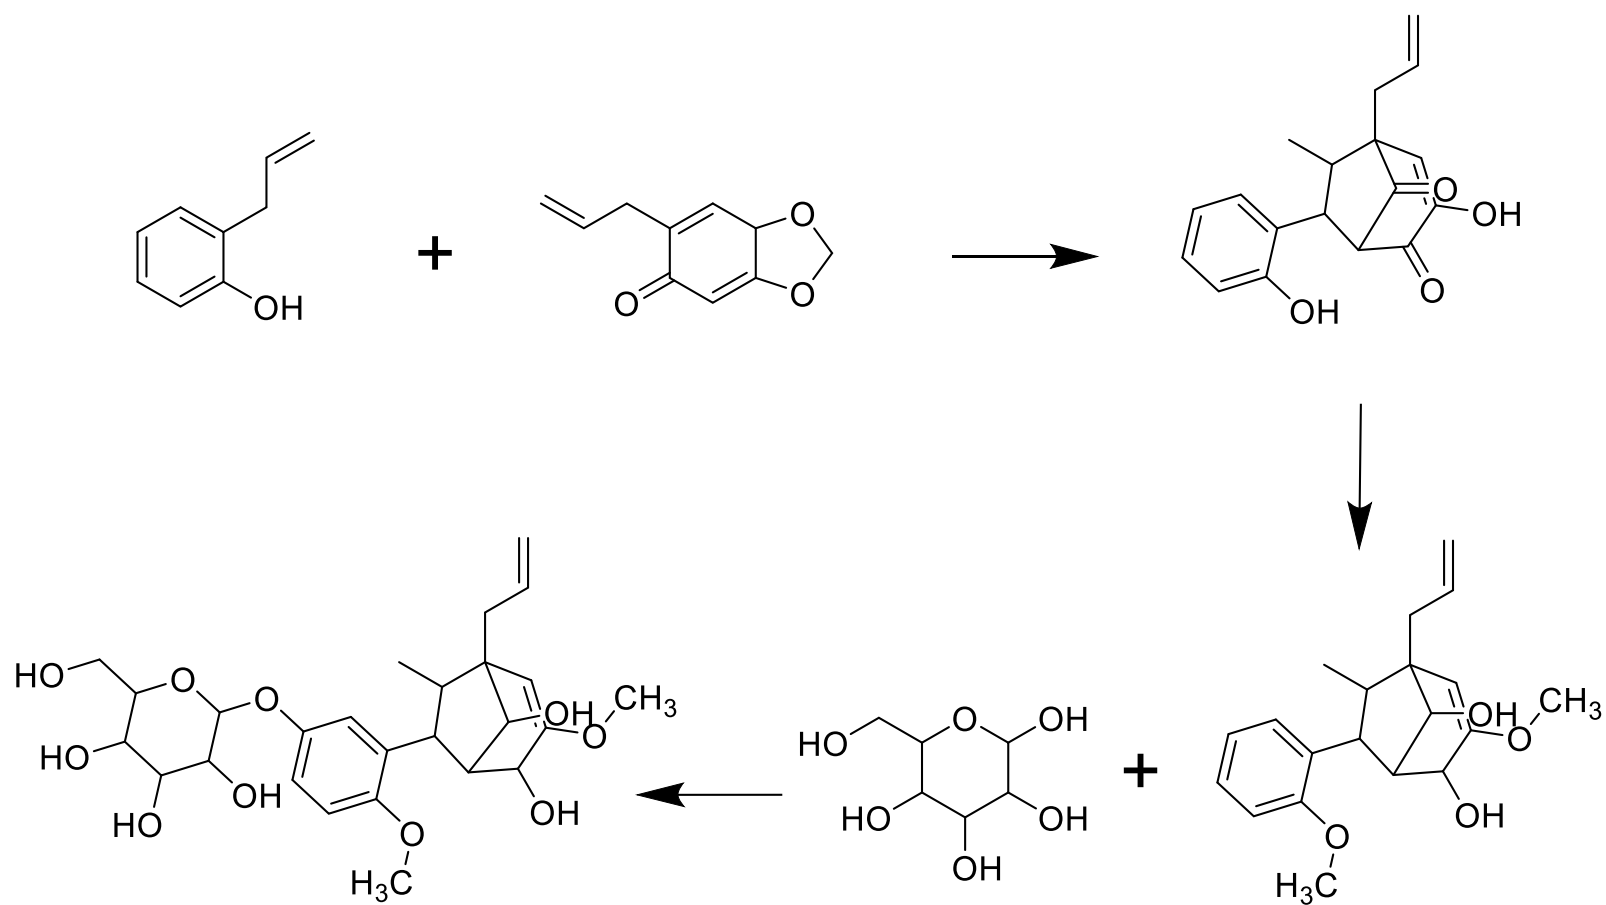

Figure S24. Speculated biosynthetic pathway of compound **1**

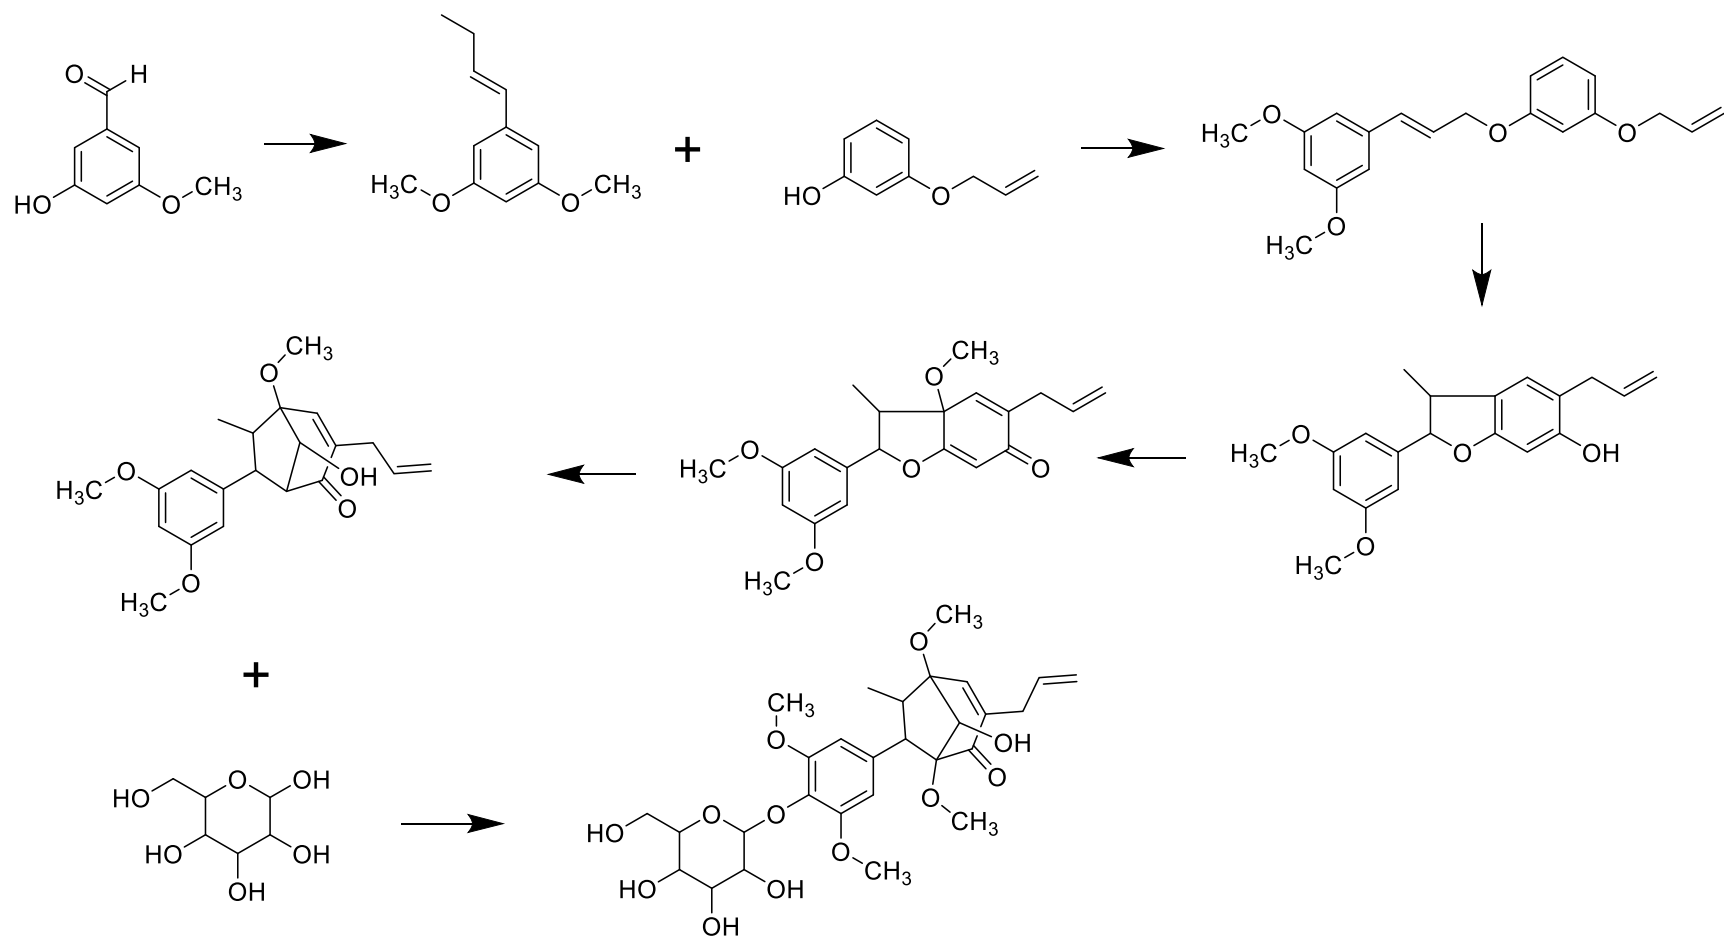

Figure S25. Speculated biosynthetic pathway of compound **3**
